# **A new robust and accurate two-sample Mendelian randomization method with a large number of genetic variants**

Lei Zhang<sup>1,2#\*</sup>, Jun-Jie Niu<sup>3#</sup>, Xian-Mei He<sup>1</sup>, Xiao Zheng<sup>1</sup>, Qi-Gang Zhao<sup>4</sup>, Xiu-Juan Yu<sup>1</sup>, Li

Luo<sup>5</sup>, Hai-Gang Ren<sup>2,6</sup>, Yu-Fang Pei<sup>2,3\*</sup>

<sup>1</sup>Center for Genetic Epidemiology and Genomics, School of Public Health, Suzhou Medical College of Soochow University, Jiangsu, 215123, PR China.

<sup>2</sup>MOE Key Laboratory of Geriatric Diseases and Immunology, Soochow University, Suzhou, Jiangsu 215123, PR China.

<sup>3</sup>Department of Orthopedic Surgery, the First Affiliated Hospital of Soochow University, Suzhou, Jiangsu, 215006, PR China.

<sup>4</sup>Department of Epidemiology and Biostatistics, School of Public Health, Suzhou Medical College of Soochow University, Suzhou, Jiangsu, 215123, PR China.

<sup>5</sup>School of Physical Education and Sport Science, Soochow University, Suzhou, 215021, PR China.

<sup>6</sup>Laboratory of Molecular Neuropathology, Jiangsu Key Laboratory of Neuropsychiatric Diseases and College of Pharmaceutical Sciences, Soochow University, Suzhou, 215123, PR China.

#: These authors contributed equally to this work.

\* Corresponding authors

Lei Zhang, Ph. D

Professor

Center for Genetic Epidemiology and Genomics

- 21 School of Public Health, Suzhou Medical College of Soochow University
- 22 199 Ren-ai Rd., Suzhou City, Jiangsu Province 215123, PR China
- 23 Tel: (86) 0512-65883871 Email: lzhang6@suda.edu.cn
- 24 Yu-Fang Pei, Ph. D
- 25 Professor
- 26 Department of Epidemiology and Biostatistics
- 27 School of Public Health, Suzhou Medical College of Soochow University
- 28 199 Ren-ai Rd., Suzhou City, Jiangsu Province 215123, PR China
- 29 Tel: (86)0512-65880079 Email: ypei@suda.edu.cn

30

## Abstract

31 Horizontal pleiotropy can significantly confound causal estimates in Mendelian  
 32 randomization (MR) studies, particularly when numerous instrumental variables (IVs) are  
 33 employed. In this study we propose a novel statistical method, Mendelian Randomization  
 34 analysis based on Z-scores (MRZ), to conduct robust and accurate MR analysis in the  
 35 presence of pleiotropy. MRZ models the IV-outcome association z-score as a mixture  
 36 distribution, separating the causal effect of the exposure on the outcome from pleiotropic  
 37 effects specific to each IV. By classifying IVs into distinct categories (valid, uncorrelated  
 38 pleiotropic, and correlated pleiotropic), MRZ constructs a likelihood function to estimate  
 39 both causal and pleiotropic effects. Simulation studies demonstrate MRZ's robustness, power,  
 40 and accuracy in identifying causal effects under diverse pleiotropic scenarios and overlapped  
 41 samples. In a bidirectional MR analysis of appendicular lean mass (ALM) and four lipid  
 42 traits using both the UK Biobank (UKB)-internal datasets and the UKB-Global Lipids  
 43 Genetics Consortium (GLGC) joint datasets, MRZ consistently identified a causal effect of  
 44 ALM on total cholesterol (TC) and low-density lipoprotein cholesterol (LDL-C). Conversely,  
 45 existing methods often detected mutual causal relationship between lipid traits and ALM,  
 46 highlighting their susceptibility to confounding by horizontal pleiotropy. A randomized  
 47 controlled experiment conducted in mice validated the absence of causal effect of TC on  
 48 ALM, corroborating the MRZ findings and further emphasizing its resilience against  
 49 pleiotropic biases.

50 **Keywords:** Mendelian randomization; uncorrelated pleiotropy; correlated pleiotropy;  
 51 appendicular lean mass; lipid traits.

## Introduction

Determining whether a modifiable exposure causes a particular disease outcome is crucial for understanding disease mechanisms and guiding prevention and clinical interventions. However, traditional observational analyses often face limitations in establishing such causal effects due to potential confounding by unobserved variables or reverse causation [1]. Mendelian randomization (MR) provides a solution by offering a statistical approach to infer causation from observational data while circumventing both unobserved confounding and reverse causation [1, 2]. MR utilizes genetic variation associated with an exposure as an instrumental variable (IV) to investigate the causal effect of the exposure on an outcome [2].

MR has proven highly successful in uncovering causal relationships across a wide range of epidemiological conditions and diseases, establishing itself as a popular approach in modern genetic epidemiology [3]. The rapid growth of genome-wide association studies (GWASs) further accelerates the application of MR by providing a wealth of data. With larger sample sizes, modern GWASs generate numerous IVs suitable for MR analysis. For instance, the latest human height GWAS identified over 11,000 independent association signals [4], enhancing the power and accuracy of MR estimation.

However, many current MR analyses are challenged by a potentially severe confounding factor known as horizontal pleiotropy [5]. Horizontal pleiotropy violates the exclusive restriction assumption underlying the MR principle, casting doubt on the validity of MR analysis [6-8]. This issue becomes more pronounced as the number of IVs increases, as chance can lead to an increase in shared heritability factors between exposure and outcome.

74 Therefore, effective correction for confounding due to horizontal pleiotropy is essential,  
75 especially in large sample settings.

76 Considerable efforts in the literature have addressed the pleiotropic effect and sought to  
77 mitigate its adverse impact on MR analysis [9, 10]. In a two-sample setting, multiple popular  
78 statistical methods accommodating pleiotropic IVs have been proposed and widely utilized  
79 [11-37]. However, under certain conditions, some methods may fail to adequately correct for  
80 horizontal pleiotropy or accurately detect true causal effects [9].

81 In this study, with the aim of conducting robust and accurate MR studies in the presence  
82 of horizontal pleiotropy, we introduce a novel statistical method. This method explicitly  
83 distinguishes causal effect from pleiotropic effect and estimates both within the maximum  
84 likelihood framework. Through simulation studies, we demonstrate that our proposed method  
85 effectively corrects for pleiotropic effects across various confounding scenarios while  
86 maintaining statistical power at a comparable level. As an application, we investigate the  
87 bidirectional causal effects of four lipid traits and appendicular lean mass (ALM) using data  
88 from the UK biobank (UKB) cohort and summary statistics from the Global Lipids Genetics  
89 Consortium (GLGC) [38]. Finally, we conduct a randomized controlled experiment in mice to  
90 address controversial findings revealed by our proposed method compared to alternative  
91 methods.

## Results

### Outline of the proposed method

The diagram illustrating the proposed method is presented in **Figure 1**. In this context, we consider the causal effect, denoted as  $r$ , of a continuous exposure trait  $X$  on a continuous outcome trait  $Y$ . Our objective is to estimate this causal effect using a collection of independent IVs that exhibit an association with  $X$ . These IVs are categorized into three distinct types based on their pleiotropic effects on the outcome and the correlation of these pleiotropic effects with the IV-exposure effects at corresponding IVs:

1. Valid IVs: These IVs do not exert horizontal pleiotropic effects on the outcome. They serve as reliable indicators of the exposure's effect on the outcome without introducing additional confounding factors.
2. Uncorrelated pleiotropic IVs: This category comprises IVs that exhibit horizontal pleiotropic effects on the outcome. However, these effects are not correlated with the corresponding IV-exposure effects.
3. Correlated pleiotropic IVs: In this category, IVs demonstrate horizontal pleiotropic effects on the outcome that are correlated with the IV-exposure effects. This correlation violates the Instrument Strength Independent of Direct Effect (INSIDE) assumption [39].

In our analysis, we used genetic association z-scores, denoted as  $z_X$  and  $z_Y$ , to estimate  $r$ . The outcome  $z_Y$  follows a normal distribution with a mean  $\mu_Y$  and a variance of one, i.e.,  $z_Y \sim N(\mu_Y, 1)$ , where  $\mu_Y$  represents the effect of the IV on the outcome. The causal effect of  $X$  on  $Y$  can be interpreted as shifting the mean  $\mu_Y$  by an IV-specific offset denoted as  $\Delta = \sqrt{\frac{N_Y}{N_X}} \times r z_X$ , where  $N_X$  and  $N_Y$  are the sample sizes of the exposure and outcome,

114 respectively. Importantly, this shift applies uniformly across all IVs regardless of whether  
115 they are valid or pleiotropic. Consequently, if we subtract this offset  $\Delta$  from  $z_Y$ , we obtain a  
116 residual z-score  $z'_Y = z_Y - \Delta$ . This residual z-score no longer contains any information  
117 about the causal effect.

118 We formulated  $z'_Y$  at different types of IVs to follow distinct distributions.

119 1. Valid IVs:  $z'_Y$  at valid IVs asymptotically follows a standard normal distribution, i.e.,

$$120 \quad z'_{Y,\text{valid}} \sim N(0, 1).$$

121 2. Uncorrelated pleiotropic IVs: At uncorrelated pleiotropic IVs,  $z'_Y$  follows a normal  
122 distribution with a fixed mean parameter  $\mu_1$  and an enlarged variance, i.e.,

$$z'_{Y,\text{unc}} \sim N(\mu_1, 1 + \sigma_{eu}^2)$$

123 , where  $\mu_1$  and  $\sigma_{eu}^2$  represent the mean and variance of the uncorrelated pleiotropic effects,  
124 respectively.

125 3. Correlated pleiotropic IVs:  $z'_Y$  at correlated pleiotropic IVs follows another normal  
126 distribution. This distribution is characterized by a mean parameter related to  $z_X$  and an  
127 enlarged variance, i.e.,

$$z'_{Y,\text{cor}} \sim N(\mu_2 + \mu_a z_X, 1 + z_X^2 \sigma_a^2 + \sigma_{ec}^2)$$

128 , where  $\mu_a$  and  $\sigma_a^2$  represent the mean and variance of the pleiotropic correlation,  
129 respectively.  $\mu_2$  and  $\sigma_{ec}^2$  represent the mean and variance of the residual pleiotropic effects  
130 after adjusting for the pleiotropic correlation.

131 These formulations allow us to account for the different distributions of residual  
132 z-scores at various types of IVs, thereby capturing the distinct effects of horizontal  
133 pleiotropy on the outcome.

Given the presence of multiple independent IVs, we employed the maximum likelihood approach to estimate the parameters from the data. We assumed that the proportions of valid IVs, uncorrelated pleiotropic IVs, and correlated pleiotropic IVs are  $(1-\tau)$ ,  $\tau(1-\rho)$ , and  $\tau\rho$ , respectively. Here,  $\tau$  and  $\rho$ , both following within the range  $[0,1]$ , represent the proportion of total pleiotropic IVs and the relative proportion of correlated pleiotropic IVs, respectively. Our model contains nine parameters in total:  $\theta = (r, \mu_1, \mu_2, \mu_a, \sigma_{eu}^2, \sigma_{ec}^2, \sigma_a^2, \tau, \rho)$ . We constructed a likelihood function of  $\theta$  as follows

$$L(\theta; \mathbf{z}_X, \mathbf{z}_Y, \mathbf{N}_X, \mathbf{N}_Y) = \prod_{m=1}^M \{(1-\tau)P_{\text{valid}}(z'_{Ym}) + \tau(1-\rho)P_{\text{unc}}(z'_{Ym} | \mu_1, \sigma_{eu}^2) + \tau\rho P_{\text{cor}}(z'_{Ym} | \mu_a, \mu_2, \sigma_a^2, \sigma_{ec}^2)\}.$$

Maximizing  $L$  with respect to  $\theta$  provides the maximum likelihood estimate of  $\theta$ . From this estimate, we can derive both the estimated causal effect, denoted as  $\hat{r}$ , and the distribution of pleiotropic effects.

To assess the statistical significance of the estimates, we employed the likelihood ratio test (LRT) approach. Specifically, we examined the significance of  $\hat{r}$  using a one-degree-of-freedom (df) chi-squared test. This test compares the maximized likelihood value with that obtained for a reduced likelihood function under the setting  $r=0$ . Additionally, we evaluated the existence of pleiotropic IVs using an 8-df chi-squared test. This test compares the maximized likelihood value with that obtained for another reduced likelihood function under the setting  $\tau=0$ , in which  $r$  is the only model parameter.

## **The distribution of $z'_Y$**

The distribution of  $z'_Y$  is central to our proposed method, Mendelian Randomization analysis using Z-scores (MRZ), as it forms the basis for distinguishing between valid and pleiotropic IVs. Among the two parameters shaping the distribution of  $z'_Y$ , variance plays a



crucial role in distinguishing between these categories. Through simulations, we investigated the distribution of  $z'_Y$  and evaluated the impact of three key factors on its variance: the sample size of the outcome ( $N_Y$ ), the variance ( $\sigma_h^2$ ) of the pleiotropic effect  $h_Y^2$ , and the frequency of positive pleiotropic IVs ( $f_p$ ). Here,  $h_Y^2$  was defined as the IV-attributable portion of outcome variance, that is, IV-specific outcome heritability. As expected,  $z'_Y$  at valid IVs consistently conforms to a standard normal distribution (**Figure 2**). Conversely, at pleiotropic IVs, the variance of  $z'_Y$  exceeds one and escalates with increasing  $N_Y$  and/or  $\sigma_h^2$ . Specifically, when all pleiotropic IVs align in the same direction as the IV-exposure effects ( $f_p=1$ ), the variance of  $z'_Y$  aligns well with theoretical expectations, which is  $\text{var}(\sqrt{N_Y} \square_Y^2)$ . This variance amplifies when pleiotropic IVs consist of a mixture of positive and negative effects, reaching its maximum when the positive and negative pleiotropic IVs are evenly balanced ( $f_p=0.5$ ).

Our simulations also revealed a striking resemblance between the distributions of  $z'_Y$  and  $z_Y$ . This similarity arises from the positive nature of all  $z_X$  by definition, leading to a consistent shift of  $z_Y$  towards  $z'_Y$  in the same direction across all IVs. Another fact reinforcing this similarity is the typically modest magnitude of the shift  $\Delta$ , attributed to the small values of  $r$  in most real applications (e.g.,  $<0.2$ ). Consequently, we approximated the variance of  $z'_Y$  by studying  $z_Y$  as if no causal effect were present. By assuming an exponential distribution for pleiotropic effects, we estimated the distribution's sole parameter [40]. Subsequently, we estimated the variance of  $z'_Y$  through Monto-Carlo sampling of  $\sqrt{N_Y h_Y^2}$ . While this estimate assumes all pleiotropic effects align in the same direction and may thus underestimate the true variance, it provides a practical lower

178 boundary from which the optimization of the likelihood function starts to work.

## 179 **Detecting pleiotropic effects**

180 When all IVs are valid, MRZ does not detect any pleiotropy in both null and causal  
181 simulations ( $P < 0.05$ ). Notably, it is more conservative than MRPRESSO [19] and  
182 MREGGER [22], both of which identify pleiotropy and horizontal pleiotropy in  
183 approximately 5% of iterations.

184 In scenarios where pleiotropic IVs are present, both MRZ and MRPRESSO  
185 demonstrate remarkable efficacy, presenting 100% power in detecting pleiotropy even when  
186 the proportion of pleiotropic IVs is as low as 10% (**Figure 3A**). Conversely, MREGGER  
187 exhibits significantly lower power in discerning the directionality of pleiotropic effects.  
188 Even at the highest proportion (60%), MR-EGGER's power rate is only 55.5%.

189 The proportion of pleiotropic IVs estimated by MRZ exhibits a high correlation with  
190 the actual proportion, irrespective of the presence of a causal effect or the correlation status  
191 of pleiotropic effects (**Figure 3B**). However, a slight overestimate of the mean proportion by  
192 a relative proportion of approximately 10% is observed across all scenarios.

193 In instances where correlated pleiotropic IVs are present, MRZ's ability to accurately  
194 estimate their proportion is unsatisfactory (**Figure 3C**). This suggests that uncorrelated and  
195 correlated pleiotropic IVs are indistinguishable by MRZ. Nevertheless, the per-IV mean  
196 correlated pleiotropic effect, defined as  $\tau\rho\mu_a$ , exhibits a perfect linear relationship with the  
197 proportion of correlated pleiotropic IVs (**Figure 3D**). The slope of this linear trend remains  
198 consistent between null and causal simulations, indicating minimal influence of the causal  
199 effect on the trend. Furthermore, the slope increases with stronger correlated pleiotropic

200 effects and diminishes when no correlated pleiotropic IVs are included. Therefore, MRZ  
201 demonstrates the capability to capture correlated pleiotropic effects by jointly modeling the  
202 proportion of correlated pleiotropic IVs and the magnitudes of their effects.

### 203 **Causal effect: type-I error rate**

204 Through a series of null simulations, we evaluated the type-I error rate of MRZ in  
205 testing causal effect. For comparative purposes, we incorporated 14 existing two-sample MR  
206 methods into our analysis. These include MREGGER [22], IVW [23], weighted-median  
207 (W-median) [21], weighted-mode (W-mode) [20], MRPRESSO [19], contamination mixture  
208 (CMix) [16], MRMix [18], MRAID [11], MRcML [12], GRAPPLE [13], MRLASSO [17],  
209 MRRAPS [14], MRROBUST [17], and CAUSE [15]. It's worth noting that there are other  
210 promising methods not included in our analysis, some of which are extensively discussed  
211 elsewhere [9].

212 In the absence of pleiotropic effects, MRZ, along with other methods, effectively  
213 maintains type-I error rates close to the desired level of 5% (**Table 1**). However, W-mode  
214 (0.2%) and CAUSE (0.1%) demonstrate conservativeness, exhibiting lower type-I error  
215 rates.

216 In scenarios where pleiotropic effects are present, MRZ consistently maintains the  
217 correct type-I error rate across various proportions of pleiotropic IVs, irrespective of  
218 whether the pleiotropic effects are uncorrelated or correlated (**Table 2**). This robust  
219 performance also holds true under balanced pleiotropic effects (**Supplemental Table 1**).  
220 Among alternative methods, W-mode and CAUSE tend to be overly conservative, resulting  
221 in significantly reduced type-I error rates in all scenarios (**Table 2**). MREGGER shows

validity only when pleiotropic effects are uncorrelated but exhibits an inflated type-I error rate of up to 28.1% when the pleiotropic effects are correlated. MRMix generally performs well under low to modest proportions of pleiotropic IVs but shows an inflated error rate reaching up to 21.6% under higher proportions. All the other alternative methods have inflated type-I error rates that increase with increased proportion of pleiotropic IVs, whereas the inflation is more severe under correlated pleiotropy than under uncorrelated pleiotropy. The type-I error rates for certain methods can reach nearly 100% in some extreme scenarios, rendering them invalid at all under such conditions. Even when the pleiotropic effects are balanced, the inflation of type-I error rates is still observed for most alternative methods, especially in correlated pleiotropic scenarios (**Supplemental Table 1**).

Further simulation studies involving a smaller set of 100 IVs (**Supplemental Table 2**) or a larger set of 500 IVs (**Supplemental Table 3**) reaffirm the validity of MRZ. Among alternative methods, W-mode and CAUSE exhibit inflated type-I error rates under high proportions of pleiotropic IVs when the number of IVs is 100 and 500, respectively, rendering them invalid (**Supplemental Tables 2-3**). Therefore, our simulations reveal MRZ's efficacy in rectifying horizontal pleiotropy across diverse confounding scenarios, where existing methods often lose validity.

Notably, MRZ demonstrates strong robustness against sample overlap due to its effective control of horizontal pleiotropy. It maintains a valid type-I error rate even when exposure and outcome samples completely overlap (**Supplemental Table 4**), making it suitable for scenarios involving a single biobank-scale dataset such as the UKB cohort.

**Causal effect: power and effect size**

244 We conducted a series of causal simulations to examine the power and effect size of  
245 various methods. In scenarios without pleiotropic effects, nearly all alternative liberal  
246 methods—those prone to type-I error under pleiotropic scenarios—demonstrate remarkably  
247 high power rates almost reaching 100% (**Table 1**). MRZ notably achieves a power rate of  
248 99.9%, positioning it among the most powerful methods. Conversely, W-mode exhibits the  
249 lowest power rate (10.4%), followed by MRMix (25.9%) and CAUSE (80.0%). Regarding  
250 effect size estimation, most methods, including MRZ, estimate mean effect sizes close to the  
251 true value of 0.050. MRZ displays one of the lowest mean errors (MEs, 0.008) among all  
252 methods. In contrast, W-mode (0.033) and MRMix (0.025) exhibit larger variations.

253 In the presence of horizontal pleiotropy, MRZ exhibits a decline in power as the  
254 proportion of pleiotropic IVs increases, as expected. This decline is similar in both positive  
255 and negative causal effect settings (**Supplemental Table 5**), indicating minimal impact of  
256 pleiotropic effects on MRZ's power across diverse scenarios. Even with the highest  
257 proportion of 60% pleiotropic IVs, MRZ's power rate maintains between 40%-58%.

258 Alternative methods demonstrate scenario-dependent performance, lacking a universal  
259 trend across all settings. The two overly conservative methods CAUSE and W-mode, along  
260 with MREGGER, MRMix and MRAID, generally exhibit declining power with increased  
261 proportion of pleiotropic IVs (**Supplemental Table 5**). For other alternative methods, two  
262 distinct trends are observed depending on the relative directions of the causal effect and the  
263 pleiotropic effects. When they align, these methods maintain high power rates at nearly 100%  
264 at all proportions of pleiotropic IVs. Conversely, when they oppose, these methods  
265 experience rapid decline in power rates with increased proportion of pleiotropic IVs

(**Supplemental Table 5**). These conflicting trends highlight potential confounding effects of uncorrected pleiotropy on power estimation.

To ensure a fair comparison of power rates among methods despite varying type-I error rates, we corrected each method's raw power rate by its type-I error rate at the corresponding null setting, assuming a correct type-I error rate of 5%. Like MRZ, all alternative methods have a decrease in their corrected power rates when the proportion of pleiotropic IVs increases (**Figure 4**). Among the methods, MRZ generally maintains the highest corrected power rate across various proportions of pleiotropic IVs. This improvement is particularly notable when the causal effect opposes the pleiotropic effects, in which cases uncorrected pleiotropic effects counteract or even reverse the true causal effect, resulting in a severe loss of power for alternative methods.

Uncorrected pleiotropic effects not only affect the power to detect the causal effect but also influence estimated effect size. MRZ's estimated effect sizes align with the true value (0.05 or -0.05) across all scenarios (**Figure 5**), regardless of the proportion of pleiotropic IVs or the direction of the causal effect. Conversely, for all alternative methods, including W-mode and CAUSE, distinct trends are observed based on the relative directions of the causal effect to pleiotropic effects. When the directions align, mean effect sizes of all alternative methods tend to increase with the proportion of pleiotropic IVs, whereas they decrease when the directions oppose. At the highest proportion of 60% pleiotropic IVs, the decrease is so severe that the estimated effect sizes from all alternative methods are opposite to the true size.

Additional simulation studies with 100 and 500 IVs (**Supplemental Figure 1**) reveal an

increased trend of MRZ's power rate with an increasing number of IVs, underscoring the critical importance of including a substantial number of IVs for robust and powerful causal inference.

When modeling no pleiotropic effects, the proposed test statistic  $T_1$  closely approximates the causal effect size estimated by the IVW test across all simulated scenarios (Supplemental Figure 2). This suggests that the IVW test provides a reasonable anchor for MRZ to adjust its estimated effect size when analyzing un-standardized summary statistics, such as case-control data.

## Running time

The computation process of MRZ primarily focuses on optimizing the likelihood function twice: once for the alternative hypothesis and once for the null hypothesis. Despite involving a high dimension of nine parameters, the derivative-free optimization algorithm *nmkb* that we employed offers an efficient solution. MRZ completes the optimization within seconds even on datasets containing 500 IVs. However, it's important to acknowledge that there is no assurance that the optimization algorithm will converge to its global maximum under such a high-dimensional parameter space. Therefore, it's recommended to conduct repeated optimizations with varying initial parameter settings to enhance the likelihood of obtaining a robust solution. In this study, a total of 20 repeats were performed to ensure the reliability of the results.

## Real data analysis

As an application, we conducted a bidirectional MR study examining the relationship between ALM and four circulating lipid traits (high-density lipoprotein cholesterol (HDL-C),

310 low-density lipoprotein cholesterol (LDL-C), total cholesterol (TC), and triglycerides (TG)).

311 We utilized two data sources: the UKB internal cohort and the summary statistics released  
312 by GLGC.

313 In the UKB-internal analysis, we randomly divided the entire UKB cohort into two  
314 independent sub-samples (UKB\_S1 and UKB\_S2). For each exposure-outcome pair (e.g.,  
315 ALM-TC), one sub-sample served as the exposure sample while the other served as the  
316 outcome sample. This process was repeated twice by reversing the roles of the two  
317 sub-samples so that two independent sets of summary statistics were generated [41]. In the  
318 UKB-GLGC joint analysis, we used the entire UKB cohort to generate GWAS summary  
319 statistics for ALM, while GLGC data (excluding UKB participants) provided summary  
320 statistics for the lipid traits. Consequently, we generated three datasets that are mutually  
321 independent in exposure and/or outcome, allowing for cross-validation of results.

322 To assess robustness against sample overlap, we conducted an MR analysis using both  
323 exposure and outcome summary statistics derived from the entire UKB cohort, resulting in  
324 complete sample overlap.

325 Observational analyses reveal significant correlations between raw ALM values and all  
326 lipid traits in the UKB cohort, and these correlations persist after adjusting for age and sex in  
327 both ALM and lipid traits (**Supplemental Table 6**). In the MR settings, the number of  
328 eligible IVs ranges from 85 to 719 across all exposure-outcome pairs (**Supplemental Tables**  
329 **7-8**). Strong IV-exposure associations are observed, with  $R^2$  values ranging from 0.05 to 0.10  
330 and  $F$ -statistics ranging from 52.1 to 188.8.



At a significance level of  $6.25 \times 10^{-3}$  ( $0.05/(2 \times 4)$ ), forward MRZ analysis identified a negative association between ALM and both TC and LDL-C (**Table 3**). This association is statistically significant in all three datasets for both traits, strengthening the evidence of causality. The estimated effect sizes are consistent across datasets for both TC (-0.079, -0.083 and -0.074) and LDL-C (-0.054, -0.063 and -0.037). Notably, the proportion of pleiotropic IVs was estimated to be modest to high for both traits, being around 30% and 40% in the UKB-internal datasets (261-268 IVs).

Forward MR analyses using MRZ did not detect significant associations between ALM and either HDL-C or TG in any of the datasets, suggesting no causal effects on both traits. Further reverse MR analyses did not identify significant associations for any lipid traits with ALM, indicating no reverse causal effect. Analysis on the completely overlapped whole UKB cohort yielded similar results (**Supplemental Table 9**), confirming MRZ's robustness against sample overlap.

We compared the MRZ results with those from alternative methods. In the forward MR analyses, all alternative methods identified the same negative causal effect of ALM on TC in one or more datasets (**Supplemental Figure 3**). However, in the reverse MR analyses, all alternative methods revealed a same negative causal effect of TC on ALM in at least one dataset (**Supplemental Figure 3**). The results of mutual causality at the same direction are observed from alternative methods on the other three lipid traits too (**Supplemental Figures 4-6**). Observing mutually reinforcing causal effects at the same direction suggests a high likelihood of pleiotropy, making it difficult to definitively determine the true causal relationship. Therefore, leaving aside the true causal relationships, none of the alternative

353 methods can produce results that are free of pleiotropic effects and that are self-validated  
354 across all datasets.

### 355 **Experimental validation**

356 Given the unidirectional causal link identified by MRZ versus the disputed  
357 bidirectional link suggested by alternative methods, there are conflicting views on the causal  
358 effect of lipid traits on ALM. To address this controversy empirically, we conducted an *in*  
359 *vivo* randomized controlled experiment using a mouse model. The experiments involved  
360 intervention with TC and compared to normal controls. The results reveal a significant  
361 increase in circulating TC levels in mice fed TC for a period of 8 weeks ( $N=12$ ) compared to  
362 normal controls ( $N=12$ , Wilcoxon rank test  $P=3.59 \times 10^{-5}$ , **Figure 6**), indicating successful  
363 implementation of the TC intervention. Additionally, significant changes are observed in  
364 HDL-C ( $P=1.24 \times 10^{-14}$ ), LDL-C ( $P=5.98 \times 10^{-9}$ ), and TG ( $P=5.98 \times 10^{-5}$ ) levels.

365 As the outcome, we observed a significant increase in total body mass ( $P=1.64 \times 10^{-3}$ )  
366 and fat body mass ( $P=1.03 \times 10^{-4}$ ) in the TC intervention group. However, there is no  
367 significant difference in lean body mass ( $P=0.80$ ), suggesting no causal effect of lipid traits  
368 on ALM. These findings are consistent with the results obtained from MRZ analyses, but  
369 differ from the conclusions drawn by most alternative methods. This highlights MRZ's  
370 resilience against horizontal pleiotropic effects, to which existing methods are more  
371 susceptible.

## 372 Discussion

373 Under the prevailing polygenic genetic architecture of complex traits, pleiotropy is  
 374 anticipated to be a common occurrence [42]. While theoretical assertions suggest that  
 375 perfectly balanced pleiotropic effects could cancel out bias [22], achieving such equilibrium  
 376 is impractical. Current MR practices often employ sensitivity analyses like the MREGGER  
 377 intercept test to evaluate pleiotropy balance [22]. However, our simulation studies revealed  
 378 that the MREGGER intercept test lacks sufficient power to detect even substantial  
 379 pleiotropic imbalances. Thus, relying solely on these methods cannot ensure that empirical  
 380 MR analyses are conducted under balanced pleiotropic conditions. Even under balanced  
 381 pleiotropy, our simulation studies demonstrated that the type-I error rate of certain methods  
 382 may inflate as the proportion of pleiotropic IVs increases. The presence of correlated  
 383 pleiotropic effects exacerbates this issue. Therefore, robust methods to address horizontal  
 384 pleiotropy are crucial to ensure the validity of MR analyses.

385 Our proposed method, MRZ, categorizes IVs into three distinct groups reflecting  
 386 potential pathways from IVs to the outcome, as depicted in the classical MR rationale  
 387 diagram. By assuming a general normality distribution for underlying pleiotropic effects, we  
 388 derived a precise distribution for IV-outcome z-scores specific to each category. In simulated  
 389 scenarios encompassing diverse pleiotropic settings, MRZ demonstrates enhanced control of  
 390 type-I error rate as well as more precise and powerful causal effect estimation than existing  
 391 methods. Notably, the normality assumption assumed by MRZ was not met in our  
 392 simulations. However, we did not observe inflated type-I error rates or imprecise effect  
 393 estimates, demonstrating the robustness of MRZ against data distribution.

Multiple sophisticated models have been proposed to address horizontal pleiotropy in MR analyses, with some examples provided in this study. While these methods demonstrate excellent performance under specific conditions, our simulation studies reveal limitations when the number of IVs reaches the hundreds. In such scenarios, certain alternative methods struggle to effectively correct for pleiotropic effects. This challenge arises because pleiotropic effects are often systematic, meaning they are not simply averaged out with an increasing number of IVs. In fact, the presence of systematic pleiotropy can worsen as the number of IVs grows.

Among alternative methods, MRMix shares a similar strategy of categorizing IVs based on their potential causal effects [18]. However, MRMix utilizes four categories reflecting all combinations of the presence or absence of direct effects between IVs and both the exposure and the outcome. This classification allows MRMix to include IVs with no association to the exposure. In contrast, MRZ assumes all IVs to be associated with the exposure, aligning with the standard practice of screening and filtering IVs in empirical MR analyses to ensure this condition.

Another key distinction between MRZ and MRMix lies in the data modeling strategy. MRMix assumes both IV-exposure and IV-outcome effects are random variables following a bivariate normal distribution. Conversely, MRZ treats the IV-exposure effect as a fixed value and models only the IV-outcome effect as a random variable with a distribution conditional on the former. This approach in MRZ eliminates the requirement for a normality assumption on the IV-exposure effect, making it more robust to non-normality, a frequent characteristic in non-infinitesimal genetic models.

Another comparable method, CMix, employs distinct probability functions to model valid and pleiotropic IVs as well. Key disparities between MRZ and CMix include the following: 1) MRZ categorizes pleiotropic IVs into uncorrelated and correlated groups, offering a more detailed classification compared to CMix, which treats all pleiotropic IVs collectively; 2) Both methods assume a normal distribution for effect sizes of pleiotropic IVs. However, MRZ allows the mean parameter of this distribution to vary freely, while CMix constrains it to zero but allows for an expanded variance; 3) MRZ integrates uncertainty regarding IV validity into its likelihood function without explicitly designating each IV as valid or pleiotropic. Conversely, CMix explicitly assigns a label to each IV based on its estimated probability of being valid or pleiotropic under each parameter setting. We argue that incorporating IV uncertainty may provide valuable insights into the distribution of pleiotropic IVs. Our simulation studies demonstrate that MRZ can effectively estimate the proportion of pleiotropic IVs, thereby supporting its efficacy.

Skeletal muscle and circulating lipids play a critical role in regulating energy balance [43-45]. They are intricately linked and share common genetic background [46, 47]. Our real data analysis revealed a high degree of pleiotropy between ALM and all the lipid traits we examined. This pleiotropy poses a significant challenge for most existing MR methods. These methods tend to have inflated type-I error rates when the proportion of pleiotropic IVs is modest to high. As evidence, all alternative methods discovered a causal effect of TC on ALM in at least one dataset. However, this finding contradicted the results of controlled experiments where TC levels were directly manipulated. In contrast, MRZ yielded a different result that aligned with the experiment results. This highlights the importance of

robust methods for accurate causal inference in MR studies, especially when pleiotropy is a major concern.

The observed causal effect of ALM on TC and LDL-C in our real data analysis is supported by nearly all alternative methods. Several plausible biological mechanisms could underlie this causality: 1) Metabolic rate and energy balance: Lean mass contributes significantly to basal metabolic rate [48, 49], which in turn can influence lipid metabolism and cholesterol levels. 2) Insulin sensitivity: Muscle tissue plays a crucial role in glucose metabolism and insulin sensitivity [50]. Higher lean mass is often associated with improved insulin sensitivity and glucose uptake [50], which in turn lead to changes in TC and LDL-C levels [51]; 3) Anti-inflammatory effects of muscle: Muscle secretes beneficial hormones such as interleukin-6 (IL-6) and irisin [52, 53], which have anti-inflammatory properties. These hormones can influence lipid metabolism and cholesterol levels [54, 55].

It should be notable that ALM is usually altered by other modifiable factors such as exercise and diet. In this case, they are in the same causal pathway, and it is unclear whether the changes in circulating TC and LDL-C are directly caused by changes in ALM or if ALM acts as a mediator of some modifiable factor. Further investigation is warranted to elucidate the biological mechanism underlying this causal relationship.

Certain limitations exist in the proposed method. Firstly, it does not account for certain biases common in MR analyses, such as weak instrument bias [56] and winner's curse bias [57]. These biases can potentially be mitigated by implementing stringent IV filtering, such as applying a more rigorous significance threshold [57]. Secondly, optimizing a high-dimensional likelihood function poses challenges in converging to its global solution.

460 To enhance the likelihood of reaching the global maximum, it is advisable to perform  
461 multiple optimizations with varying initial parameters. However, this approach increases  
462 computational burden and does not guarantee attainment of the global maximum. Thirdly,  
463 the proposed method requires both exposure and outcome sample sizes as input, unlike other  
464 methods that do not have this requirement. This necessity arises because z-scores are  
465 meaningful only within the context of a specific sample size. If exposure and outcome  
466 sample sizes are uniform so that their ratios are constant across all IVs, then the detailed  
467 sample sizes are indeed unnecessary because the estimated effect size remains unchanged  
468 after calibrating to the effect size estimated by the IVW test. However, if sample sizes vary  
469 across IVs, then providing this information is essential for unbiased estimation by the  
470 proposed method. Furthermore, in scenarios involving case-control studies with imbalanced  
471 case-to-control ratios, employing an effective sample size rather than a raw sample size is  
472 preferable for accurate estimation [58].

473 In summary, we have proposed a novel two-sample MR method that demonstrates  
474 robustness against horizontal pleiotropic effects, while also offering accuracy and power  
475 across a wide range of scenarios. By applying this method to investigate the relationship  
476 between ALM and lipid traits, we identified a negative causal effect of ALM on TC and  
477 LDL-C. Our proposed method serves as a valuable alternative to existing MR methods,  
478 particularly in the analysis of large-scale biobank datasets with numerous IVs. With its  
479 ability to provide reliable and precise causal inference, our method contributes to advancing  
480 the field of MR analysis and enhances our understanding of complex biological  
481 relationships.

## Online methods

### Basic model

We assumed a continuous exposure trait  $X$ , a continuous outcome trait  $Y$ , and a bi-allelic SNP  $G$  taking values between 0, 1, and 2. For ease of presentation, we assumed  $X$  and  $Y$  are standardized so that their variances are one. Assumed that  $G$  is associated with  $X$  and serves as its IV and that the associations of  $G$  with both  $X$  and  $Y$  were tested under an additive mode of inheritance.

The basic phenotype model for MR analysis was formulated as following

$$X = \beta_1 G + \varepsilon_X,$$

$$Y = rX + \varepsilon_Y = (r\beta_1)G + \varepsilon'_Y$$

, where  $\beta_1$  measures the effect of  $G$  on  $X$ ,  $r$  measures the causal effect of  $X$  on  $Y$ , and  $\varepsilon_X$  and  $\varepsilon_Y$  ( $\varepsilon'_Y$ ) are independently and normally distributed random errors. Here, we used the term  $r$  for a causal effect of  $X$  on  $Y$  because it is equivalent to the correlation coefficient for two standardized phenotypes.

In the above model, the parameter  $r$  is the focus of MR analysis. In a typical two-sample MR analysis, regression coefficients of both  $X$  and  $Y$  on  $G$  are available from GWAS analyses, denoted by  $\hat{\beta}_1$  and  $\hat{\beta}_G^Y$ . Then an unbiased estimator of  $r$  would be [23]

$$\hat{r} = \frac{\hat{\beta}_G^Y}{\hat{\beta}_1}.$$

Below, we modeled the estimation problem using the genetic association z-score, which is defined as the regression coefficient divided by its standard error. Specifically,

$$z_X = \frac{\hat{\beta}_1}{\hat{\sigma}_1}, \text{ and } z_Y = \frac{\hat{\beta}_G^Y}{\hat{\sigma}_G^Y}$$

, where  $\hat{\sigma}_1$  and  $\hat{\sigma}_G^Y$  are standard errors of  $\hat{\beta}_1$  and  $\hat{\beta}_G^Y$ .



503 The squared  $z$ -score statistic, termed  $s_X$  or  $s_Y$ , is commonly used to test the genetic  
504 association between  $G$  and  $X$  or  $Y$ . When there is no association, the  $s$  statistic asymptotically  
505 follows a 1-df central chi-squared distribution. Accordingly, the  $z$ -score asymptotically  
506 follows a standard normal distribution. In contrast, when genetic association exists, the  $s$   
507 statistic asymptotically follows a 1-df non-central chi-squared distribution characterized by a  
508 non-central parameter (NCP)  $\lambda$ , and the  $z$ -score asymptotically follows a normal distribution  
509 with variance one but with a non-zero mean parameter  $\mu$  where  $\mu^2 = \lambda$ , i.e.,

$$510 \quad z \xrightarrow{d} N(\mu, 1),$$

$$511 \quad s = z^2 \xrightarrow{d} \chi_1^2(\lambda).$$

512 In our previous study, we proved that the NCP parameter  $\lambda$  is a function of sample  
513 size  $N$  and SNP effect size  $h^2$  [40]. Specifically,

$$\lambda = N \times \ln\left(\frac{1}{1-h^2}\right) \approx Nh^2, \text{ for } h^2 \ll 1$$

514 , where  $\ln(\cdot)$  represents natural logarithm transformation, and  $h^2$  is the portion of phenotypic  
515 variance explained by the SNP, e.g., the SNP-specific heritability. Specifically, we had

$$516 \quad h_X^2 = \frac{\text{var}(\beta_1 G)}{\text{var}(X)}, \text{ and } h_Y^2 = \frac{\text{var}(r\beta_1 G)}{\text{var}(Y)} = h_X^2 r^2$$

517 , so that the mean parameters for  $X$  and  $Y$  have the following forms

$$\mu_X = \sqrt{\lambda_X} = \sqrt{N_X h_X^2}$$

$$518 \quad , \text{ and } \mu_Y = \sqrt{N_Y h_Y^2} = \sqrt{\frac{N_Y}{N_X}} \times r\mu_X$$

519 Clearly, the mean parameter  $\mu_Y$  is completely determined by  $\mu_X$  and their causal effect  $r$ .

520 In the above formula, the parameter  $\mu_X$  is unknown and could be estimated from the  
521 GWAS summary statistics with the following formula

$$\hat{\mu}_X = \sqrt{\frac{N_X \hat{\beta}_1^2 \times 2f(1-f)}{\text{var}(X)}}$$

522 , where  $f$  is minor allele frequency (MAF) of the IV. However, in practical released GWAS  
523 summary statistics  $X$  may not be standardized so that its variance  $\text{var}(X)$  is unknown. In this  
524 case, recall that

$$525 \quad p(z_X | \mu_X) = \frac{1}{\sqrt{2\pi}} e^{-\frac{(z_X - \mu_X)^2}{2}}.$$

526 Therefore, we replaced  $\mu_X$  by its maximum likelihood estimation, which is  $z_X$ , and re-wrote  
527 the form of  $\mu_Y$

$$528 \quad \mu_Y = \sqrt{\frac{N_Y}{N_X}} \times r z_X = \Delta \quad (1)$$

529 Given  $\Delta$ , the probability of observing  $z_Y$  is simply the density of a normal distribution  
530  $N(\Delta, 1)$ . Equivalently, if we let  $z'_Y = z_Y - \Delta$ , then  $z'_Y$  follows a standard normal  
531 distribution  $N(0, 1)$

$$532 \quad z'_Y = z_Y - \Delta \xrightarrow{d} N(0, 1).$$

### 533 **Estimating $r$ using z-scores**

534 When multiple independent IVs are available, we built the estimation model within the  
535 maximum likelihood framework. Assumed that there are a total of  $M$  independent IVs. Let  
536  $\mathbf{z}_X = (z_{X1}, z_{X2}, \dots, z_{XM})'$  and  $\mathbf{z}_Y = (z_{Y1}, z_{Y2}, \dots, z_{YM})'$  be corresponding z-score vectors.  
537 We constructed the likelihood function of  $r$  as

$$538 \quad L(r; \mathbf{z}_X, \mathbf{z}_Y, N_X, N_Y) = \prod_{m=1}^M p(z'_{Ym}).$$

539 Maximizing the likelihood function  $L(r)$  yielded the maximum likelihood estimate of  $r$ ,  
540 denoted by  $\hat{r}$ , and the maximum likelihood, denoted by  $L(\hat{r})$ .

541 The significance of  $\hat{r}$  was evaluated using the LRT approach. Specifically, by  
542 restricting  $r=0$ , we obtained the null likelihood  $L_0$ . We then constructed the likelihood ratio

test statistic as follows

$$T_1 = -2(\log(L_0) - \log(L(\hat{r}))). \quad (2)$$

Under the null hypothesis of  $r=0$ ,  $T_1$  approximately follows a 1-df central chi-squared distribution, which is used to judge the significance of  $\hat{r}$ .

### Modeling uncorrelated and correlated horizontal pleiotropy effects

We defined an IV to be valid if it has no horizontal pleiotropic effect. For a pleiotropic IV, the estimator  $\hat{r}$  is not necessarily an unbiased estimator of  $r$  anymore. To see this, we re-wrote the phenotype model for  $Y$  as

$$\begin{aligned} Y &= rX + \beta_2 G + \varepsilon_Y \\ &= (\beta_1 r + \beta_2)G + \varepsilon'_Y \end{aligned}$$

, where  $\beta_2$  measures the pleiotropic effect of  $G$  on  $Y$  that is not mediated by  $X$ . In this model,  $\hat{r}$  is an unbiased estimator of the following parameter instead

$$E(\hat{r}) = E\left(\frac{\hat{\beta}_G^Y}{\hat{\beta}_1}\right) = r + \frac{\beta_2}{\beta_1}.$$

Depending on the direction of  $\beta_2$ ,  $\hat{r}$  could overestimate or underestimate the true effect  $r$ .

In the presence of pleiotropy, the association of  $G$  with  $Y$  is a mixture of the  $X$ -mediated causal effect and the pleiotropic effect. Accordingly, the mean parameter  $\mu_Y$  is a mixture of two components (**Supplemental Notes**)

$$\mu_Y = \Delta + \mu_P$$

so that

$$z'_Y = (z_Y - \Delta) \xrightarrow{d} N(\mu_P, 1) \quad (3)$$

, where  $\mu_P^2 = N_Y h_P^2$  is a parameter defined by pleiotropy driven heritability

$$h_P^2 = \frac{\text{var}(\beta_2 G)}{\text{var}(Y)}.$$

In the above formula, the mean parameter  $\mu_Y$  is composed of two components: the first one is the causal effect, and the second one is the pleiotropic effect. The causal effect is fixed for not only valid IVs but also pleiotropic IVs. In contrast, the pleiotropic effect exists at pleiotropic IVs only and may vary depending on the strength of the IV-outcome effect, and was therefore modeled as a random effect. After removing the causal effect, the residual outcome z-score contains information about the pleiotropic effect only. Depending on whether it is correlated to  $z_X$  or not, the pleiotropic effect is further classified into two types. In the first type, the pleiotropic effect is directly on the outcome, so it is uncorrelated to  $z_X$ . In this case,  $\mu_P$  was modeled as a  $z_X$ -independent normally distributed effect

$$\mu_{P_{\text{unc}}} = \mu_1 + \varepsilon_1, \quad \varepsilon_1 \sim N(0, \sigma_{\varepsilon_1}^2).$$

In the second type, the pleiotropic effect is influenced by some unmeasured confounder that is correlated to both the exposure and the outcome.  $\mu_P$  in this type is correlated to  $z_X$  and the INSIDE assumption is violated [39]. Accordingly, it was modeled as a  $z_X$ -related normally distributed effect

$$\mu_{P_{\text{cor},m}} = \mu_2 + a_m z_{Xm} + \varepsilon_2, \quad \varepsilon_2 \sim N(0, \sigma_{\varepsilon_2}^2)$$

, where  $a_m$  measures the correlation between  $\mu_{P_{\text{cor},m}}$  and  $z_{Xm}$  at the  $m$ th IV. We added the subscript  $m$  in  $\mu_{P_{\text{cor}}}$  to emphasize that  $a_m$  is IV-specific whose magnitude depends on the magnitude of the pleiotropy effect at the  $m$ th IV. To account for the variation of  $a_m$ , it was further modeled as a normally distributed random effect

$$a_m \sim N(\mu_a, \sigma_a^2),$$

where  $\mu_a$  and  $\sigma_a^2$  measure mean pleiotropic correlation and its variance, respectively.

Until now, we have built a hierarchical model towards the mean parameter of  $z_Y'$

distribution. We aimed to obtain its marginal distribution. To integrate out the intermediate dummy variables, we introduced the following lemma,

*Lemma I, If a random variable  $X$  follows a normal distribution  $X \sim N(\mu, \sigma_1^2)$ , and if its mean parameter  $\mu$  is another random variable following a second normal distribution  $\mu \sim N(\mu_1, \sigma_2^2)$ , then the marginal distribution of  $X$  is again a normal distribution of the form  $X \sim N(\mu_1, \sigma_1^2 + \sigma_2^2)$  (Supplemental Notes).*

Applying this lemma, we first integrated out  $a_m$  to obtain the marginal distribution of  $\mu_{P_{cor}}$

$$\mu_{P_{cor}} \sim N(\mu_2 + \mu_a z_X, z_X^2 \sigma_a^2 + \sigma_{ec}^2).$$

We then in turn integrated out  $\mu_{P_{unc}}$  and  $\mu_{P_{cor}}$  to obtain the marginal distribution of  $z'_Y$

$$z'_{Y,unc} \sim N(\mu_1, 1 + \sigma_{eu}^2)$$

and

$$z'_{Y,cor} \sim N(\mu_2 + \mu_a z_X, 1 + z_X^2 \sigma_a^2 + \sigma_{ec}^2).$$

Taken together, for the three types of IVs (valid, uncorrelated pleiotropic and correlated pleiotropic), the residual z-score  $z'_Y$  after removing the causal effect  $r$  has a type-specific distribution

$$z'_Y \sim \begin{cases} N(0,1), \text{ valid IV;} \\ N(\mu_1, 1 + \sigma_{eu}^2), \text{ uncorrelated pleiotropic IV;} \\ N(\mu_2 + \mu_a z_X, 1 + z_X^2 \sigma_a^2 + \sigma_{ec}^2), \text{ correlated pleiotropic IV.} \end{cases} \quad (4)$$

One key inference from the above distributions is that  $z'_Y$  at different types has distinct variances. Specifically,  $z'_Y$  at valid IVs has an exact variance of one.  $z'_Y$  at pleiotropic IVs has a greater variance. This feature may make the three types of IVs distinguishable.

# **Likelihood function under horizontal pleiotropy**

We assumed that the proportions of valid IVs, uncorrelated pleiotropic IVs and correlated pleiotropic IVs are  $(1-\tau)$ ,  $\tau(1-\rho)$ , and  $\tau\rho$ , where  $\tau$  and  $\rho \in [0,1]$  measure the

604 proportion of pleiotropic IVs and the relative proportion of correlated pleiotropic IVs,  
605 respectively. Our model contains nine parameters in total:

606  $\theta = (r, \mu_1, \mu_2, \mu_a, \sigma_a^2, \sigma_{eu}^2, \sigma_{ec}^2, \tau, \rho)$ . We constructed a likelihood function of  $\theta$  as follows

$$607 \quad L(\theta; \mathbf{z}_X, \mathbf{z}_Y, N_X, N_Y) = \prod_{m=1}^M \{ (1 - \tau) P_{\text{valid}}(z'_{Ym}) + \tau (1 - \rho) P_{\text{unc}}(z'_{Ym} | \mu_1, \sigma_{eu}^2) + \tau \rho P_{\text{cor}}(z'_{Ym} | \mu_a, \mu_2, \sigma_a^2, \sigma_{ec}^2) \} \quad (5)$$

608 , where the probability densities were defined by equation (4).

609 Maximizing  $L$  regarding  $\theta$  yields the maximum likelihood estimate of  $\theta$ , denoted by  
610  $\hat{\theta}$ , and the maximum likelihood, denoted by  $L(\hat{\theta})$ . We maximized  $L$  using the function *nmkb*  
611 in the R package *dfoptim*, which implements a derivative-free Nelder–Mead algorithm for  
612 high-dimensional function.

### 613 **Test of causal effect**

614 The causal effect is tested against the null hypothesis of  $r=0$  by means of the LRT  
615 approach. Specifically, by restricting  $r=0$  in (5), we constructed the null likelihood function,  
616 denoted by  $L_0$ , which contains eight parameters. Maximizing  $L_0$  over its sample space yields  
617 the maximum likelihood under the null hypothesis, denoted by  $L_0(\hat{\theta}_0)$ . The LRT statistic was  
618 then constructed as follows

$$619 \quad T_2 = -2(\log(L_0(\hat{\theta}_0)) - \log(L(\hat{\theta}))). \quad (6)$$

620 Under the null hypothesis of  $r=0$ ,  $T_2$  approximately follows a 1-df central chi-squared  
621 distribution, which was used to declare the significance of  $\hat{r}$ .

### 622 **Test of pleiotropic effects**

623 The existence of pleiotropic effects was tested against the null hypothesis of  $\tau=0$  using  
624 the same LRT approach. Under the null hypothesis, the likelihood function contains only one  
625 free parameter  $r$ . Therefore, we used a 8-df central chi-squared distribution to declare the

626 significance of the estimate  $\hat{\tau}$ .

627 In implementation, we will first test pleiotropic effects at the significance level  $P < 0.05$ .

628 If there is evidence of pleiotropic effects, then we will use  $T_2$  to test the causal effect;

629 otherwise, we will use  $T_1$  instead.

### 630 **Unstandardized phenotypes**

631 Since  $\hat{\tau}$  is estimated based on z-scores, its test significance remains unchanged

632 regardless of whether exposure or outcome is standardized. However, its magnitude may

633 differ from the original effect size when unstandardized exposure or outcome is analyzed.

634 The ratio of  $\hat{\tau}$  to the original effect size is a constant  $C$  that is determined by the unit of

635 exposure and outcome under analysis. In certain scenarios, it is desirable to obtain the

636 original effect size, such as to recover the odds ratio for case-control data types.

637 To recover the original effect size, we estimated  $C$  by anchoring our test to a

638 comparable alternative test. As demonstrated in the Results section, our proposed test

639 statistic  $T_1$ , which assumes no pleiotropic effects, yields an effect size approximately equal

640 to the IVW test, which also assumes no pleiotropic effects. Consequently, we conducted both

641 the  $T_1$  test and the IVW test on the same dataset and estimated  $C$  by calculating the ratio of

642 their effect sizes.

### 643 **Simulation studies**

644 We performed a series of simulation studies to evaluate the performance of the

645 proposed method. We simulated one continuous exposure  $X$ , one continuous outcome  $Y$  and

646 one continuous confounder  $U$ . We simulated a set of bi-allelic SNP as IVs for the exposure.

647 We studied a two-sample context so that the exposure and outcome summary statistics were

648 generated from two separate samples. Parameter settings were as follows:

- 649 1) The number of IVs was set to be  $M=200$ .
- 650 2) Both exposure and outcome sample sizes were set to be  $N_X=N_Y=200,000$ .
- 651 3) The causal effect of  $X$  on  $Y$  was set to be  $r=0$  (null), 0.05 (positive effect), or -0.05  
652 (negative effect). In the latter two cases,  $X$  explained  $r^2=0.25\%$  of  $Y$ 's variance.
- 653 4) Confounder effect. In the case of confounding effect, the effect of the confounder  $U$  was  
654 set to explain 20% of phenotypic variance in both  $X$  and  $Y$ . The effect directions of  $U$  on  
655 both  $X$  and  $Y$  were set to be the same.
- 656 5) Proportion of pleiotropic IVs to the outcome ( $\tau$ ). The proportion of pleiotropic IVs  $\tau$   
657 varied from 10% to 60% at an increment of 10%. The default direction of the pleiotropic  
658 effects was assumed to be positively dominated, in which 70% : 30% of pleiotropic IVs  
659 were simulated to have positive : negative pleiotropic effects. In the case of balanced  
660 pleiotropic effects, 50% : 50% of pleiotropic IVs were simulated to have positive : negative  
661 pleiotropic effects.
- 662 6) Relative proportion of correlated IVs ( $\rho$ ). From the pleiotropic IVs simulated in step 5),  
663 a fraction of  $\rho = 0.5$  IVs were simulated to also have a pleiotropic effect on  $U$ . For ease of  
664 presentation, the direction of the pleiotropic effects on  $U$  was set to be the same as that on  $Y$ .
- 665 7) IV effects on exposure. We assumed a non-infinitesimal genetic architecture for  
666 IV-exposure effects. A proportion of 10% of total IVs were simulated to have a large effect  
667 each explaining 0.2% of  $X$ 's variance. The portion of explained variance for each of the  
668 remaining 90% IVs was drawn from an exponential distribution with a mean  $1.0 \times 10^{-4}$ , a  
669 level comparable to the majority of GWAS findings. The 200 IVs explained approximately a



670 total of 5.8% of  $X$ 's variance.

671 8) IV pleiotropic effects on outcome and confounder. The portion of the variance in both  $Y$   
672 and  $U$  explained by each pleiotropic IV was drawn from an exponential distribution with a  
673 mean  $1.0 \times 10^{-4}$ .

674 Each scenario was simulated with 1,000 iterations. At each simulation iteration, the  
675 MAF of each IV was drawn from a uniform distribution  $uni(0.05, 0.5)$ , and the IV genotypes  
676 at both exposure and outcome samples were simulated using PLINK [59] assuming the  
677 Hardy-Weinberger equilibrium. After the phenotypes were simulated, PLINK was invoked  
678 to test genetic association in both the exposure and the outcome samples.

## 679 **Comparison with existing methods**

680 We evaluated and compared the performance of the proposed method with 14 existing  
681 two-sample MR methods, including IVW [23], MREGGER [22], weighted-median  
682 (W-median) [21], weighted-mode (W-mode) [20], MRPRESSO [19], the contamination  
683 mixed model (CMix) [16], MRMix [18], MRAID [11], MRcML [12], GRAPPLE [13],  
684 MRLASSO [17], MRRAPS [14], MRROBUST [17], and CAUSE [15]. Comparison criteria  
685 included type-I error rate, power rate and estimated effect size. The statistical significance  
686 was declared at the nominal level  $\alpha=0.05$ . In power rate estimation, only effects in the same  
687 direction as the true effect were considered as potentially successful hits. Effects in the  
688 opposite direction were not considered regardless of their statistical significance.

689 Because various methods may possess different type-I error rates, comparing raw  
690 power rates may be unfair. To ensure a fair comparison of power rates, the raw power rate  
691 was corrected by calibrating it with the type-I error rate estimated at the corresponding null

condition. This correction was only for comparison purpose. It allows all methods to operate under the assumption of possessing a correct type-I error rate of 0.05

$$\text{Power}_{\text{cor}} = \text{Power}_{\text{raw}} - \text{type-I} + 0.05.$$

CAUSE requires a substantial number of background SNPs spanning the genome to estimate its model parameters. To meet this requirement, we generated an additional random set of 100,000 independent SNPs that are associated with neither the exposure nor the outcome. This combination of 100,000 background SNPs and the IVs was used for estimating nuisance parameters (step 1), while only the IVs were used for causal inference (step 2). For all other methods, only the IVs were used for causal inference.

Due to their high computational demands, CAUSE and MRPRESSO were assessed across 200 iterations.

### **Real data application**

Lean body mass is an important physiological index. Low ALM, coupled with diminished muscle strength and reduced physical performance, serves as a defining criterion for the onset of sarcopenia [60], which is a critical condition that can significantly impair function, lead to physical disability, and is a major modifiable risk factor for frailty in older adults [61, 62]. Lipids are another cluster of metabolites related to energy balance [63, 64]. Disorders of lipid metabolism can co-occur with the loss of skeletal muscle mass [65, 66]. However, the mutual relationship between ALM and lipid traits has not been well-studied. Uncovering their causal relationships is thus needed to facilitate the prediction and intervention of sarcopenia.

As a real application, we conducted a comprehensive bidirectional MR study between

714 ALM and four lipid traits, including HDL-C, LDL-C, TC, and TG using two data sources:  
715 the UKB internal cohort and the summary statistics released by GLGC. The study (project  
716 number 41542) was covered by general ethical approval for the UKB study, and was  
717 approved by the Northwest Centre for Research Ethics Committee (11/NW/0382). All  
718 participants provided informed consent.

719 The study design is displayed in **Supplemental Figure 7**. In brief, we performed both  
720 the UKB-internal analysis and the UKB-GLGC joint analysis. In the UKB-internal analysis,  
721 we randomly divided the entire UKB cohort into two independent sub-samples (UKB\_S1  
722 and UKB\_S2). For each exposure-outcome pair (e.g., ALM-TC), one sub-sample served as  
723 the exposure sample, while the other served as the outcome sample. This process was  
724 repeated by reversing the roles of the two sub-samples so that two independent sets of  
725 summary statistics were generated [41]. In the UKB-GLGC analysis, the whole UKB cohort  
726 was used to generate GWAS summary statistics for ALM, while the GLGC data (excluding  
727 UKB participants) provided summary statistics for the lipid traits. In total, for each  
728 exposure-outcome pair, we generated three datasets that are mutually independent in  
729 exposure and/or outcome, so that the results from them could cross-validate each other.

730 To evaluate the influence of sample overlap, we also applied a MR analysis in which  
731 both the exposure and the outcome summary statistics were derived from the whole UKB  
732 cohort, so that both samples completely overlapped.

733 The details of the analysis are described in **Supplemental Notes**. In brief, the GWAS of  
734 UKB samples was performed with BOLT-LMM [67]. Genome-wide significant ( $p < 5.0 \times$   
735  $10^{-8}$ ) SNPs were selected from the exposure sample, followed by clumping ( $LD\ r^2 = 0.01$

and window size=500 kb) to select eligible IVs using *TwoSampleMR* R package. In the UKB-GLGC joint analysis, GWAS of ALM was conducted in the whole UKB cohort, while the GWAS summary statistics of lipid traits were derived from the released GLGC results including no UKB participants. In the UKB-overlapping analysis, the GWAS summary statistics of both ALM and lipid traits were derived from the whole UKB cohort. The QC and MR analysis procedure are the same across various analyses. However, in analyses using UKB samples only (UKB-internal and UKB-overlapping), palindromic IVs were not excluded, while in the UKB-GLGC joint analysis, palindromic IVs were excluded to avoid strand orientation error.

#### **Mouse-model experiments**

The experimental procedures and treatments conducted in this study were ethically reviewed and approved by the Animal Care Ethical Committee of Soochow University, Suzhou, China, ensuring compliance with animal welfare guidelines and regulations.

Male C57BL/6 mice, aged 8 weeks and weighing  $20 \pm 5$  g, were procured from Shanghai Lingchang Biotechnology Co., LTD. These mice were housed in a controlled environment with a temperature of  $23 \pm 1$  °C and a 12:12-hour light-dark cycle (lights on from 07:00 to 19:00), and they had free access to food and water throughout the experiment.

Following a 1-week acclimatization period, the mice were randomly assigned to two groups: the control group ( $N=12$ ) and the TC group ( $N=12$ ). Standard feed was obtained from Double Lion Experimental Animal Feed Technology Co., LTD, Suzhou. The control group received a standard diet consisting of 71% normal diet food, 20% protein, 4% fat, and 5% fiber. In contrast, the TC group received a high-cholesterol diet comprising 68.3%

758 normal diet food, 1.3% cholesterol, 18.4% lard, and 12% protein. This dietary intervention  
759 continued for a duration of 8 weeks.

760 Body composition analysis, including measurements of total body mass, fat mass, lean  
761 mass, and fluid content, was conducted on live animals without the use of anesthesia. This  
762 analysis was performed using small animal MRI equipment (Minispec LF50 body  
763 composition analyzer, Bruker, Billerica, MA, USA). To conduct the measurements, each  
764 mouse was placed in a specially designed plastic holder tailored for mice, without the need  
765 for sedation or anesthesia. Subsequently, the holder containing the mouse was positioned  
766 within the measuring space of the MRI system. To ensure the accuracy of the results,  
767 measures were taken to prevent the mice from moving within the holder during the scanning  
768 process. Each scan lasted approximately 2 minutes, during which the MRI equipment  
769 captured detailed data on the body composition of the mice.

770 Blood biochemistry analysis was conducted using a Hitachi 7100 clinical chemistry  
771 analyzer in accordance with the manufacturer's guidelines. Approximately 500  $\mu$ L of plasma  
772 was collected from each mouse and transferred to a gel tube containing lithium heparin.  
773 Subsequently, the plasma samples were centrifuged at 5000 rpm using a refrigerated  
774 centrifuge set at 4°C for 15 minutes to obtain 160–200  $\mu$ L of serum. In cases where the  
775 volume of serum obtained was insufficient for analysis, it was diluted with deionized water  
776 at a ratio of 1:2 to ensure proper loading for analysis. This process ensured accurate and  
777 reliable blood biochemistry measurements for each sample.

778           For each trait, the difference of measurement between the endpoint and the baseline  
779           was analyzed. The comparison was made between the control group and the intervention  
780           group using the Wilcoxon rank test in R package.

## 781 **Competing interests**

782 We declare that none of the authors have competing financial or non-financial interests.

## 783 **Data availability**

784 Access to UK Biobank data can be obtained by application to UK Biobank

785 (<https://www.ukbiobank.ac.uk/>).

## 786 **Code availability**

787 All analyses have been performed using publicly available software or custom codes.

788 PLINK (v1.90b6.5, <https://www.cog-genomics.org/plink/>) and BOLT-LMM (v2.3.2,

789 <https://alkesgroup.broadinstitute.org/BOLT-LMM/>) were used to perform association

790 analysis in the simulated data and in the UK Biobank data, respectively. The MR analyses

791 were performed using R (v4.3.2, <https://cran.r-project.org/>). The R package TwoSampleMR

792 (v0.5.7, <https://github.com/MRCIEU/TwoSampleMR>) was used to implement the IVW,

793 MREGGER, W-median, and W-mode methods. MRAID

794 (<https://github.com/yuanzhongshang/MRAID>), CAUSE (v1.2.0,

795 <https://github.com/jean997/cause>), MRcML (<https://github.com/xue-hr/MRcML/>),

796 GRAPPLE (<https://github.com/jingshuw/GRAPPLE>), MRMix

797 (<https://github.com/gqi/MRMix>), mr.raps (<https://github.com/qingyuanzhao/mr.raps>),

798 MR-PRESSO (<https://github.com/rondolab/MR-PRESSO>) were used to implement

799 respective methods. MendelianRandomization (v0.9.0,

800 <https://cran.r-project.org/web/packages/MendelianRandomization/index.html>) was used to

801 implement the CMix, MRLASSO and MRROBUST methods [68]. The R package dfoptim

802 (v2023.1.0, <https://cran.r-project.org/web/packages/dfoptim/index.html>) was used to

803 optimize high-dimensional likelihood function.

## Figure legends

### Figure 1. Diagram of the proposed method.

Four elements are involved: IV  $G$ , exposure  $X$ , outcome  $Y$ , and confounder  $U$ .  $X$  and  $Y$  are represented by their association z-scores with  $G$ . There are three potential pathways from  $G$  to  $Y$ , depending on  $G$ 's pleiotropic status: valid (purple), uncorrelated pleiotropic (blue) and correlated pleiotropic (red). The causal effect  $\Delta$  (green) exists in all pathways. After removing the causal effect  $\Delta$  from  $z_Y$  (lower panel), the residual outcome z-score  $z'_Y$  contains information on pleiotropic effects only. Depending on in which pathway  $G$  is,  $z'_Y$  has a pathway-specific distribution (right panel), which is used to differentiate valid and pleiotropic IVs.

### Figure 2. The distribution of outcome z-scores at valid and pleiotropic IVs.

The influence of three factors on the distribution of outcome z-score was evaluated: outcome sample size ( $N_Y=1e5$  or  $2e5$ ), the variance of IV-specific heritability to the outcome ( $\sigma_h^2$ ), and the proportion of positive pleiotropic IVs ( $f_p=0.5, 0.7$  or  $1.0$ ). The IV-specific heritability  $\sigma_Y^2$  was drawn from an exponential distribution with a mean  $5e-5$  or  $1e-4$  so that its variance  $\sigma_h^2=(5e-5)^2$  or  $(1e-4)^2$ . The exposure sample size was set to be  $N_X=2e5$ . The causal effect of  $X$  on  $Y$  was set to be  $r=0.05$ .  $z_Y$  is IV-outcome z-score.  $z'_Y$  is the residual of  $z_Y$  after removing the causal effect.  $\text{var}(z'_{Y,\text{theo}})$  is the theoretical variance assuming  $f_p=1.0$ . At valid IVs, both  $z_Y$  and  $z'_Y$  conform to a standard normal distribution. At pleiotropic IVs, the variance of  $z'_Y$  exceeds one and escalates with increasing  $N_Y$  and/or  $\sigma_h^2$ . When  $f_p=1.0$ , the variance of  $z'_Y$  aligns well with  $\text{var}(z'_{Y,\text{theo}})$ , and amplifies when  $f_p<1.0$ , peaking when



825 the positive and negative pleiotropic IVs are evenly balanced ( $f_p=0.5$ ).  $z_Y$  has a similar  
826 distribution to  $z'_Y$ .

### 827 **Figure 3. The performance of MRZ in detecting pleiotropic effects.**

828 A total of 200 IVs and 1000 iterations were simulated. **A**, The proportion of pleiotropic IVs  
829 ranges from 10%-60%. The relative proportion of correlated pleiotropic IVs is 50%. The  
830 power of detecting pleiotropy was declared at  $\alpha = 0.05$  level. **B**, Presented is the mean  
831 estimated proportion of pleiotropic IVs. Error bar is its standard deviation. Four scenarios  
832 were simulated, correlated pleiotropic effects and no causal effect (correlated\_null),  
833 correlated pleiotropic effects and causal effect (correlated\_causal), uncorrelated pleiotropic  
834 effects and no causal effect (uncorrelated\_null), and uncorrelated pleiotropic effects and  
835 causal effect (uncorrelated\_causal). **C**, In this simulation, the proportion of pleiotropic IVs  
836 was fixed at 60%, while the relative proportion of correlated pleiotropic IVs ranges from  
837 10%-60%. Both causal and null scenarios were simulated. Presented is the mean estimated  
838 proportion of correlated pleiotropic IVs. The error bar is its standard deviation. **D**, the per-IV  
839 correlated pleiotropic effect was defined as the product of the proportion of correlated  
840 pleiotropic IVs and the mean correlated pleiotropic effect. The IV-specific heritability to the  
841 confounder was drawn from an exponential distribution with a mean  $1e-4$ ,  $5e-5$ , or 0,  
842 respectively. These different settings correspond to different magnitudes of correlated  
843 pleiotropic effects.

### 844 **Figure 4. Corrected power rate of various methods for testing causal effect.**

845 A total of 200 IVs were simulated. The sample sizes for both exposure and outcome samples

were  $2e5$ . The 200 IVs explained approximately a portion of 5.8% of the exposure variance. A positively dominated pleiotropic setting was simulated, in which 70% pleiotropic IVs were simulated to have positive pleiotropic effects while the remaining 30% were simulated to have negative pleiotropic effects. In addition, half pleiotropic IVs were simulated to be correlated with the corresponding IV-exposure effects. The causal effect  $r$  was set to be 0.05 (positive effect) or -0.05 (negative effect). The statistical significance was declared at  $\alpha = 0.05$  level. Raw power rate was corrected by calibrating it with the type-I error rate estimated at the corresponding null condition, using the equation

$$\text{Power}_{\text{cor}} = \text{Power}_{\text{raw}} - \text{type-I} + 0.05.$$

#### **Figure 5. Estimated causal effect size of various methods.**

The causal effect  $r$  was set to be 0.05 (positive effect) or -0.05 (negative effect). The mean effect size across 1,000 iterations is presented.

#### **Figure 6. The randomized controlled experiment intervened by TC in mice.**

Male C57BL/6 mice were randomly allocated to control group ( $N=12$ ) and intervention group ( $N=12$ ), followed by intervention by TC diet in the TC group for 8 weeks. For each trait, the difference of measurement between the endpoint and the baseline was analyzed. The comparison was made between the control group and the intervention group using the Wilcoxon rank test. \*\*\*,  $P < 0.001$ ; \*\*,  $P < 0.01$ ; NS, non-significant ( $P > 0.05$ ).

864

**Table 1, Performance of various methods with all valid IVs.**

| Method   | $r=0.00$     | $r=0.05$ |        |       |
|----------|--------------|----------|--------|-------|
|          | Type-I error | Power    | Effect | ME    |
| MRZ      | 0.052        | 0.999    | 0.049  | 0.008 |
| CAUSE    | 0.001        | 0.800    | 0.050  | 0.008 |
| W-mode   | 0.002        | 0.104    | 0.050  | 0.033 |
| MREGGER  | 0.049        | 0.950    | 0.049  | 0.011 |
| MRMix    | 0.068        | 0.259    | 0.049  | 0.025 |
| IVW      | 0.065        | 0.999    | 0.049  | 0.008 |
| W-median | 0.031        | 0.948    | 0.049  | 0.010 |
| GRAPPLE  | 0.056        | 0.999    | 0.050  | 0.008 |
| MRcML    | 0.067        | 0.999    | 0.050  | 0.008 |
| RAPS     | 0.057        | 0.999    | 0.050  | 0.008 |
| MRROBUST | 0.061        | 0.999    | 0.049  | 0.008 |
| MRLASSO  | 0.073        | 0.998    | 0.049  | 0.008 |
| CMix     | 0.054        | 0.998    | 0.049  | 0.008 |
| MRPRESSO | 0.050        | 0.998    | 0.049  | 0.008 |
| MRAID    | 0.047        | 0.997    | 0.049  | 0.008 |

865 Notes: A total of 1,000 iterations were simulated. In each iteration, the sample size for both  
866 exposure and outcome samples was set to be 200,000. A total of 200 IVs were simulated, all  
867 of which are valid having no pleiotropic effect on the outcome. The 200 IVs explain  
868 approximately a portion of 5.8% of the exposure variance. Causal effect size was set to be  
869  $r=0.00$  (null) or  $r=0.05$  (causal). Effect, mean estimated effect size across the 1,000  
870 iterations; ME, mean error, defined as the absolute error of the estimated effect size from the  
871 true effect size  $r=0.05$ .

872

**Table 2, Type-I error rates of various methods under pleiotropic effects.**

| PleiotropicIVs(%)       | MRZ  | CAUSE | W-mode | EGGER | MRMix | MRAID | IVW  | W-median | CMix | GRAPPLE | MRcML | MRROBUST | MRLASSO | RAPS | MRPRESSO |
|-------------------------|------|-------|--------|-------|-------|-------|------|----------|------|---------|-------|----------|---------|------|----------|
| Uncorrelated pleiotropy |      |       |        |       |       |       |      |          |      |         |       |          |         |      |          |
| 10                      | 0.05 | 0.00  | 0.00   | 0.06  | 0.03  | 0.06  | 0.15 | 0.05     | 0.07 | 0.04    | 0.12  | 0.08     | 0.10    | 0.08 | 0.08     |
| 20                      | 0.04 | 0.00  | 0.00   | 0.06  | 0.06  | 0.08  | 0.30 | 0.07     | 0.12 | 0.13    | 0.26  | 0.12     | 0.16    | 0.16 | 0.19     |
| 30                      | 0.04 | 0.00  | 0.00   | 0.05  | 0.05  | 0.14  | 0.47 | 0.12     | 0.24 | 0.31    | 0.42  | 0.24     | 0.30    | 0.31 | 0.49     |
| 40                      | 0.07 | 0.01  | 0.01   | 0.06  | 0.09  | 0.22  | 0.60 | 0.21     | 0.40 | 0.54    | 0.61  | 0.47     | 0.51    | 0.50 | 0.66     |
| 50                      | 0.05 | 0.01  | 0.01   | 0.06  | 0.10  | 0.31  | 0.69 | 0.30     | 0.53 | 0.68    | 0.75  | 0.69     | 0.71    | 0.61 | 0.83     |
| 60                      | 0.04 | 0.02  | 0.01   | 0.05  | 0.22  | 0.44  | 0.77 | 0.45     | 0.73 | 0.81    | 0.87  | 0.83     | 0.89    | 0.73 | 0.92     |
| Correlated pleiotropy   |      |       |        |       |       |       |      |          |      |         |       |          |         |      |          |
| 10                      | 0.03 | 0.00  | 0.00   | 0.10  | 0.02  | 0.04  | 0.32 | 0.03     | 0.05 | 0.03    | 0.10  | 0.05     | 0.07    | 0.06 | 0.11     |
| 20                      | 0.06 | 0.00  | 0.00   | 0.12  | 0.04  | 0.08  | 0.62 | 0.08     | 0.12 | 0.25    | 0.21  | 0.11     | 0.19    | 0.20 | 0.25     |
| 30                      | 0.05 | 0.01  | 0.00   | 0.16  | 0.05  | 0.10  | 0.81 | 0.17     | 0.20 | 0.62    | 0.39  | 0.24     | 0.38    | 0.51 | 0.69     |
| 40                      | 0.04 | 0.01  | 0.01   | 0.20  | 0.05  | 0.15  | 0.93 | 0.30     | 0.34 | 0.87    | 0.57  | 0.59     | 0.67    | 0.82 | 0.91     |
| 50                      | 0.05 | 0.02  | 0.01   | 0.24  | 0.08  | 0.25  | 0.98 | 0.49     | 0.54 | 0.97    | 0.74  | 0.93     | 0.89    | 0.94 | 0.95     |
| 60                      | 0.05 | 0.02  | 0.03   | 0.28  | 0.18  | 0.40  | 0.99 | 0.67     | 0.70 | 0.99    | 0.88  | 0.98     | 0.97    | 0.98 | 1.00     |

873 Notes: A total of 200 IVs and 1,000 iterations were simulated. Sample size for both exposure and outcome samples was set to be 2e5. The 200 IVs explain  
874 approximately a portion of 5.8% of the exposure variance. In the case of uncorrelated pleiotropy, 70% of all pleiotropic IVs were randomly selected to have  
875 positive pleiotropic effects while the remaining 30% pleiotropic IVs were simulated to have negative pleiotropic effects. In the case of correlated pleiotropy,  
876 50% of pleiotropic IVs were simulated to be correlated with the corresponding IV-exposure effects. The causal effect  $r$  was set to be 0. The significance  
877 threshold was set to 0.05.

878

**Table 3, Bidirectional causal effects of ALM and lipid traits identified by MRZ.**

| Trait | Samples       | N         | Forward (ALM->lipids) |                |      |                    |       |      |                | Reverse (lipids->ALM) |                |       |                    |       |      |      |
|-------|---------------|-----------|-----------------------|----------------|------|--------------------|-------|------|----------------|-----------------------|----------------|-------|--------------------|-------|------|------|
|       |               |           | IVs                   | R <sup>2</sup> | F    | f <sub>pleio</sub> | r     | SE   | P              | IVs                   | R <sup>2</sup> | F     | f <sub>pleio</sub> | r     | SE   | P    |
| TC    | UKB_S1/UKB_S2 | 220K/216K | 268                   | 0.06           | 52.5 | 0.32               | -0.08 | 0.02 | <b>3.65E-6</b> | 100                   | 0.06           | 131.6 | 0.69               | -0.05 | 0.04 | 0.22 |
|       | UKB_S2/UKB_S1 | 220K/216K | 261                   | 0.06           | 52.3 | 0.33               | -0.08 | 0.02 | <b>1.01E-6</b> | 115                   | 0.06           | 112.9 | 0.77               | -0.07 | 0.03 | 0.03 |
|       | UKB/GLGC      | 440K/912K | 716                   | 0.09           | 64.3 | 0.61               | -0.07 | 0.01 | <b>3.64E-7</b> | 497                   | 0.09           | 175.1 | 0.88               | -0.05 | 0.02 | 0.02 |
| LDL-C | UKB_S1/UKB_S2 | 220K/216K | 268                   | 0.06           | 52.5 | 0.37               | -0.05 | 0.02 | <b>2.67E-3</b> | 85                    | 0.05           | 139.6 | 0.74               | -0.06 | 0.04 | 0.13 |
|       | UKB_S2/UKB_S1 | 220K/216K | 261                   | 0.06           | 52.3 | 0.46               | -0.06 | 0.02 | <b>3.54E-4</b> | 92                    | 0.05           | 129.0 | 0.63               | -0.06 | 0.03 | 0.05 |
|       | UKB/GLGC      | 440K/825K | 718                   | 0.10           | 64.4 | 0.56               | -0.04 | 0.01 | <b>4.97E-3</b> | 397                   | 0.08           | 188.8 | 0.66               | -0.04 | 0.02 | 0.01 |
| TG    | UKB_S1/UKB_S2 | 220K/208K | 267                   | 0.06           | 52.4 | 0.56               | 0.01  | 0.03 | 0.75           | 109                   | 0.05           | 107.6 | 0.66               | 0.03  | 0.02 | 0.15 |
|       | UKB_S2/UKB_S1 | 220K/209K | 260                   | 0.06           | 52.1 | 0.53               | -0.02 | 0.02 | 0.33           | 113                   | 0.05           | 103.4 | 1.00               | -0.05 | 0.04 | 0.28 |
|       | UKB/GLGC      | 440K/849K | 715                   | 0.09           | 64.3 | 1.00               | -0.03 | 0.05 | 0.49           | 461                   | 0.07           | 148.1 | 1.00               | -0.04 | 0.03 | 0.23 |
| HDL-C | UKB_S1/UKB_S2 | 220K/196K | 268                   | 0.06           | 52.5 | 0.71               | -0.01 | 0.04 | 0.78           | 191                   | 0.10           | 110.0 | 0.69               | -0.03 | 0.02 | 0.21 |
|       | UKB_S2/UKB_S1 | 220K/196K | 261                   | 0.06           | 52.3 | 0.77               | -0.03 | 0.04 | 0.46           | 197                   | 0.09           | 103.0 | 0.73               | -0.03 | 0.02 | 0.16 |
|       | UKB/GLGC      | 440K/874K | 719                   | 0.10           | 64.5 | 0.98               | -0.04 | 0.07 | 0.53           | 565                   | 0.09           | 153.4 | 0.85               | 0.02  | 0.02 | 0.49 |

879

Notes: The entire UKB cohort was randomly divided into two independent sub-samples (UKB\_S1 and UKB\_S2). For the UKB-internal analysis, the two

880

sub-samples were used as exposure and outcome samples, respectively. For the UKB-GLGC joint analysis, the entire UKB sample was used for ALM, while

881

GLGC summary statistics were used for lipid traits. For each ALM-lipid pair, three datasets were analyzed. TC, total cholesterol; LDL-C, low-density

882 lipoprotein cholesterol; TG, triglyceride; HDL-C, high-density lipoprotein cholesterol; Samples, the two samples used for ALM/lipid traits;  $N$ , sample size,  
883  $K$  represents kilo; IVs, the number of IVs;  $R^2$ , the portion of exposure variance explained by all IVs;  $F$ ,  $F$ -statistic;  $f_{pleio}$ , the estimated proportion of  
884 pleiotropic IVs;  $r$ , estimated causal effect;  $P$ , p-value. The significance threshold was set at  $6.25 \times 10^{-3}$  (0.05/8). Significant associations were marked in bold.

## 885 **Acknowledgments**

886 This research was conducted using the UK Biobank resource under application number  
887 41542. Special thank was given to an anonymous reviewer whose constructive comments  
888 advised us to model correlated pleiotropic effects. This study was partially supported by the  
889 funding from National Natural Science Foundation of China (32170670 to YFP, 81902181 to  
890 JJN), the Project of MOE Key Laboratory of Geriatric Diseases and Immunology  
891 (JYN202401 to HGR), and Suzhou Basic Research Program (Medical Application Basic  
892 Research) (SKY2023147 to JJN).  
893

894

## References

- 895 1. Smith, G.D. and S. Ebrahim, 'Mendelian randomization': can genetic epidemiology contribute to  
896 understanding environmental determinants of disease? *Int J Epidemiol*, 2003. **32**(1): p. 1-22.
- 897 2. Burgess, S., et al., *Use of Mendelian randomisation to assess potential benefit of clinical*  
898 *intervention*. *BMJ*, 2012. **345**: p. e7325.
- 899 3. Burgess, S., et al., *Guidelines for performing Mendelian randomization investigations: update*  
900 *for summer 2023*. *Wellcome Open Res*, 2019. **4**: p. 186.
- 901 4. Yengo, L., et al., *A saturated map of common genetic variants associated with human height*.  
902 *Nature*, 2022. **610**(7933): p. 704-712.
- 903 5. Solovieff, N., et al., *Pleiotropy in complex traits: challenges and strategies*. *Nat Rev Genet*, 2013.  
904 **14**(7): p. 483-95.
- 905 6. Ebrahim, S. and G. Davey Smith, *Mendelian randomization: can genetic epidemiology help*  
906 *redress the failures of observational epidemiology?* *Hum Genet*, 2008. **123**(1): p. 15-33.
- 907 7. Hemani, G., J. Bowden, and G. Davey Smith, *Evaluating the potential role of pleiotropy in*  
908 *Mendelian randomization studies*. *Hum Mol Genet*, 2018. **27**(R2): p. R195-R208.
- 909 8. Holmes, M.V., M. Ala-Korpela, and G.D. Smith, *Mendelian randomization in cardiometabolic*  
910 *disease: challenges in evaluating causality*. *Nat Rev Cardiol*, 2017. **14**(10): p. 577-590.
- 911 9. Sanderson, E., et al., *Mendelian randomization*. *Nat Rev Methods Primers*, 2022. **2**.
- 912 10. Slob, E.A.W. and S. Burgess, *A comparison of robust Mendelian randomization methods using*  
913 *summary data*. *Genet Epidemiol*, 2020. **44**(4): p. 313-329.
- 914 11. Yuan, Z., et al., *Likelihood-based Mendelian randomization analysis with automated instrument*  
915 *selection and horizontal pleiotropic modeling*. *Sci Adv*, 2022. **8**(9): p. eab15744.
- 916 12. Xue, H., X. Shen, and W. Pan, *Constrained maximum likelihood-based Mendelian randomization*  
917 *robust to both correlated and uncorrelated pleiotropic effects*. *Am J Hum Genet*, 2021. **108**(7): p.  
918 1251-1269.
- 919 13. Wang, J., et al., *Causal inference for heritable phenotypic risk factors using heterogeneous*  
920 *genetic instruments*. *PLoS Genet*, 2021. **17**(6): p. e1009575.
- 921 14. Zhao, Q., et al., *Statistical Inference in two-sample summary-data Mendelian randomization*  
922 *using robust adjusted profile score*. *The Annals of Statistics*, 2020. **48**(3): p. 1742-1769.
- 923 15. Morrison, J., et al., *Mendelian randomization accounting for correlated and uncorrelated*  
924 *pleiotropic effects using genome-wide summary statistics*. *Nat Genet*, 2020. **52**(7): p. 740-747.
- 925 16. Burgess, S., et al., *A robust and efficient method for Mendelian randomization with hundreds of*  
926 *genetic variants*. *Nat Commun*, 2020. **11**(1): p. 376.
- 927 17. Rees, J.M.B., et al., *Robust methods in Mendelian randomization via penalization of*  
928 *heterogeneous causal estimates*. *PLoS One*, 2019. **14**(9): p. e0222362.
- 929 18. Qi, G. and N. Chatterjee, *Mendelian randomization analysis using mixture models for robust and*  
930 *efficient estimation of causal effects*. *Nat Commun*, 2019. **10**(1): p. 1941.
- 931 19. Verbanck, M., et al., *Detection of widespread horizontal pleiotropy in causal relationships*  
932 *inferred from Mendelian randomization between complex traits and diseases*. *Nat Genet*, 2018. **50**(5):  
933 p. 693-698.
- 934 20. Hartwig, F.P., G. Davey Smith, and J. Bowden, *Robust inference in summary data Mendelian*  
935 *randomization via the zero modal pleiotropy assumption*. *Int J Epidemiol*, 2017. **46**(6): p. 1985-1998.
- 936 21. Bowden, J., et al., *Consistent Estimation in Mendelian Randomization with Some Invalid*



937 *Instruments Using a Weighted Median Estimator*. Genet Epidemiol, 2016. **40**(4): p. 304-14.

938 22. Bowden, J., G. Davey Smith, and S. Burgess, *Mendelian randomization with invalid instruments:*

939 *effect estimation and bias detection through Egger regression*. Int J Epidemiol, 2015. **44**(2): p.

940 512-25.

941 23. Burgess, S., A. Butterworth, and S.G. Thompson, *Mendelian randomization analysis with*

942 *multiple genetic variants using summarized data*. Genet Epidemiol, 2013. **37**(7): p. 658-65.

943 24. Jiang, L., et al., *Constrained instruments and their application to Mendelian randomization with*

944 *pleiotropy*. Genet Epidemiol, 2019. **43**(4): p. 373-401.

945 25. Cho, Y., et al., *Exploiting horizontal pleiotropy to search for causal pathways within a Mendelian*

946 *randomization framework*. Nat Commun, 2020. **11**(1): p. 1010.

947 26. Sanderson, E., et al., *An examination of multivariable Mendelian randomization in the*

948 *single-sample and two-sample summary data settings*. Int J Epidemiol, 2019. **48**(3): p. 713-727.

949 27. Burgess, S. and S.G. Thompson, *Multivariable Mendelian randomization: the use of pleiotropic*

950 *genetic variants to estimate causal effects*. Am J Epidemiol, 2015. **181**(4): p. 251-60.

951 28. Zhu, Z., et al., *Causal associations between risk factors and common diseases inferred from*

952 *GWAS summary data*. Nat Commun, 2018. **9**(1): p. 224.

953 29. Bowden, J., et al., *Improving the accuracy of two-sample summary-data Mendelian*

954 *randomization: moving beyond the NOME assumption*. Int J Epidemiol, 2019. **48**(3): p. 728-742.

955 30. Foley, C.N., et al., *MR-Clust: clustering of genetic variants in Mendelian randomization with*

956 *similar causal estimates*. Bioinformatics, 2021. **37**(4): p. 531-541.

957 31. Berzuini, C., et al., *A Bayesian approach to Mendelian randomization with multiple pleiotropic*

958 *variants*. Biostatistics, 2020. **21**(1): p. 86-101.

959 32. Xu, S., W.K. Fung, and Z. Liu, *MRCIP: a robust Mendelian randomization method accounting for*

960 *correlated and idiosyncratic pleiotropy*. Brief Bioinform, 2021. **22**(5).

961 33. Cheng, Q., et al., *MR-LDP: a two-sample Mendelian randomization for GWAS summary statistics*

962 *accounting for linkage disequilibrium and horizontal pleiotropy*. NAR Genom Bioinform, 2020. **2**(2): p.

963 lqaa028.

964 34. Zhu, X., et al., *An iterative approach to detect pleiotropy and perform Mendelian Randomization*

965 *analysis using GWAS summary statistics*. Bioinformatics, 2021. **37**(10): p. 1390-1400.

966 35. Grant, A.J. and S. Burgess, *An efficient and robust approach to Mendelian randomization with*

967 *measured pleiotropic effects in a high-dimensional setting*. Biostatistics, 2022. **23**(2): p. 609-625.

968 36. Howey, R., et al., *Bayesian network analysis incorporating genetic anchors complements*

969 *conventional Mendelian randomization approaches for exploratory analysis of causal relationships in*

970 *complex data*. PLoS Genet, 2020. **16**(3): p. e1008198.

971 37. Long, D., Q. Zhao, and Y. Chen, *A latent mixture model for heterogeneous causal mechanisms in*

972 *Mendelian randomization*. The Annals of Applied Statistics, 2024. **18**(2): p. 966-990.

973 38. Graham, S.E., et al., *The power of genetic diversity in genome-wide association studies of lipids*.

974 Nature, 2021. **600**(7890): p. 675-679.

975 39. Burgess, S. and S.G. Thompson, *Interpreting findings from Mendelian randomization using the*

976 *MR-Egger method*. Eur J Epidemiol, 2017. **32**(5): p. 377-389.

977 40. Zhang, L., et al., *A new method for estimating effect size distribution and heritability from*

978 *genome-wide association summary results*. Hum Genet, 2016. **135**(2): p. 171-84.

979 41. Denault, W.R.P., et al., *Cross-fitted instrument: A blueprint for one-sample Mendelian*

980 *randomization*. PLoS Comput Biol, 2022. **18**(8): p. e1010268.

981 42. Watanabe, K., et al., *A global overview of pleiotropy and genetic architecture in complex traits.*  
982 Nat Genet, 2019. **51**(9): p. 1339-1348.

983 43. Frontera, W.R. and J. Ochala, *Skeletal muscle: a brief review of structure and function.* Calcif  
984 Tissue Int, 2015. **96**(3): p. 183-95.

985 44. Zurlo, F., et al., *Skeletal muscle metabolism is a major determinant of resting energy expenditure.*  
986 J Clin Invest, 1990. **86**(5): p. 1423-7.

987 45. Havel, P.J., *Update on adipocyte hormones: regulation of energy balance and carbohydrate/lipid*  
988 *metabolism.* Diabetes, 2004. **53 Suppl 1**: p. S143-51.

989 46. Vella, C.A., et al., *Skeletal muscle area and density are associated with lipid and lipoprotein*  
990 *cholesterol levels: The Multi-Ethnic Study of Atherosclerosis.* J Clin Lipidol, 2020. **14**(1): p. 143-153.

991 47. Pickrell, J.K., et al., *Detection and interpretation of shared genetic influences on 42 human traits.*  
992 Nat Genet, 2016. **48**(7): p. 709-17.

993 48. Luke, A. and D.A. Schoeller, *Basal metabolic rate, fat-free mass, and body cell mass during*  
994 *energy restriction.* Metabolism, 1992. **41**(4): p. 450-6.

995 49. Johnstone, A.M., et al., *Factors influencing variation in basal metabolic rate include fat-free*  
996 *mass, fat mass, age, and circulating thyroxine but not sex, circulating leptin, or triiodothyronine.* Am J  
997 Clin Nutr, 2005. **82**(5): p. 941-8.

998 50. Merz, K.E. and D.C. Thurmond, *Role of Skeletal Muscle in Insulin Resistance and Glucose Uptake.*  
999 Compr Physiol, 2020. **10**(3): p. 785-809.

1000 51. Hirano, T., *Pathophysiology of Diabetic Dyslipidemia.* J Atheroscler Thromb, 2018. **25**(9): p.  
1001 771-782.

1002 52. Welc, S.S. and T.L. Clanton, *The regulation of interleukin-6 implicates skeletal muscle as an*  
1003 *integrative stress sensor and endocrine organ.* Exp Physiol, 2013. **98**(2): p. 359-71.

1004 53. Brenmoehl, J., et al., *Irisin is elevated in skeletal muscle and serum of mice immediately after*  
1005 *acute exercise.* Int J Biol Sci, 2014. **10**(3): p. 338-49.

1006 54. Nakagomi, A., et al., *Relationships between the serum cholesterol levels, production of*  
1007 *monocyte proinflammatory cytokines and long-term prognosis in patients with chronic heart failure.*  
1008 Intern Med, 2014. **53**(21): p. 2415-24.

1009 55. Hardardottir, I., C. Grunfeld, and K.R. Feingold, *Effects of endotoxin and cytokines on lipid*  
1010 *metabolism.* Curr Opin Lipidol, 1994. **5**(3): p. 207-15.

1011 56. Burgess, S., N.M. Davies, and S.G. Thompson, *Bias due to participant overlap in two-sample*  
1012 *Mendelian randomization.* Genet Epidemiol, 2016. **40**(7): p. 597-608.

1013 57. Jiang, T., et al., *An empirical investigation into the impact of winner's curse on estimates from*  
1014 *Mendelian randomization.* Int J Epidemiol, 2023. **52**(4): p. 1209-1219.

1015 58. Winkler, T.W., et al., *Quality control and conduct of genome-wide association meta-analyses.*  
1016 Nat Protoc, 2014. **9**(5): p. 1192-212.

1017 59. Purcell, S., et al., *PLINK: a tool set for whole-genome association and population-based linkage*  
1018 *analyses.* Am J Hum Genet, 2007. **81**(3): p. 559-75.

1019 60. Cruz-Jentoft, A.J., et al., *Sarcopenia: revised European consensus on definition and diagnosis.*  
1020 Age Ageing, 2019. **48**(1): p. 16-31.

1021 61. Giles, J.T., et al., *Association of body composition with disability in rheumatoid arthritis: impact*  
1022 *of appendicular fat and lean tissue mass.* Arthritis Rheum, 2008. **59**(10): p. 1407-15.

1023 62. Janssen, I., S.B. Heymsfield, and R. Ross, *Low relative skeletal muscle mass (sarcopenia) in older*  
1024 *persons is associated with functional impairment and physical disability.* J Am Geriatr Soc, 2002.

1025 50(5): p. 889-96.

1026 63. Arner, P., et al., *Dynamics of human adipose lipid turnover in health and metabolic disease*.  
1027 Nature, 2011. **478**(7367): p. 110-3.

1028 64. Arner, P., et al., *Adipose lipid turnover and long-term changes in body weight*. Nat Med, 2019.  
1029 **25**(9): p. 1385-1389.

1030 65. Jiang, Y., et al., *The association of lipid metabolism and sarcopenia among older patients: a*  
1031 *cross-sectional study*. Sci Rep, 2023. **13**(1): p. 17538.

1032 66. Kim, G. and J.H. Kim, *Impact of Skeletal Muscle Mass on Metabolic Health*. Endocrinol Metab  
1033 (Seoul), 2020. **35**(1): p. 1-6.

1034 67. Loh, P.R., et al., *Efficient Bayesian mixed-model analysis increases association power in large*  
1035 *cohorts*. Nat Genet, 2015. **47**(3): p. 284-90.

1036 68. Yavorska, O.O. and S. Burgess, *MendelianRandomization: an R package for performing*  
1037 *Mendelian randomization analyses using summarized data*. Int J Epidemiol, 2017. **46**(6): p.  
1038 1734-1739.

1039

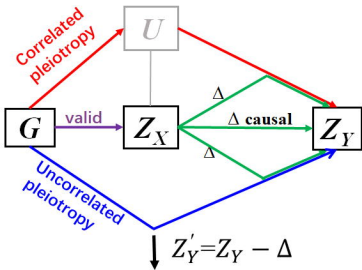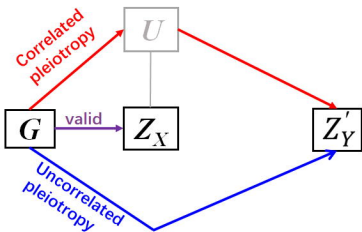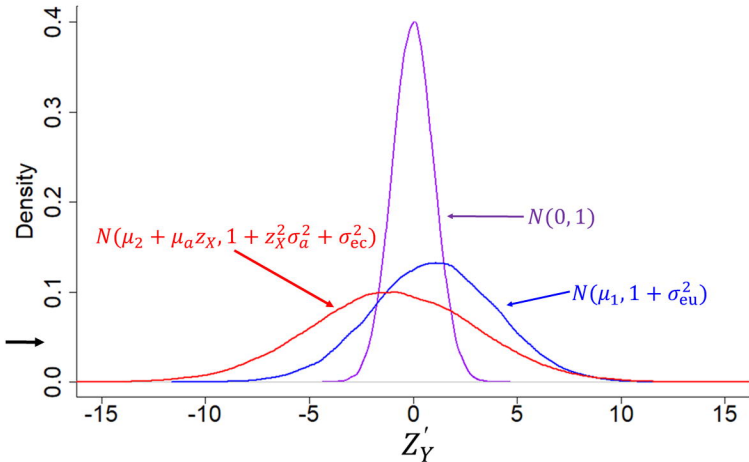

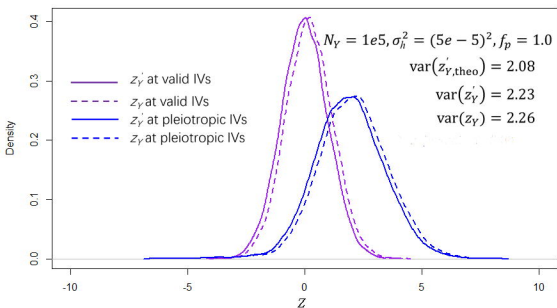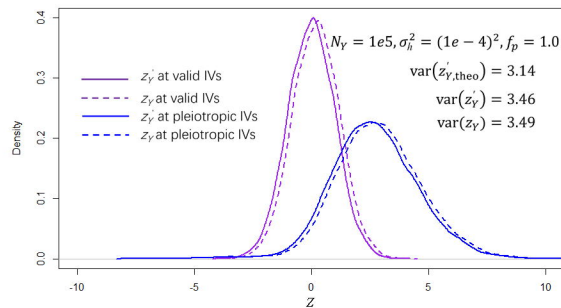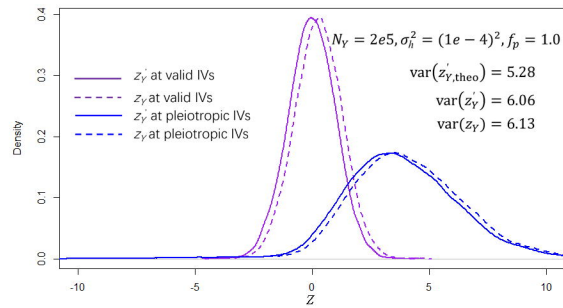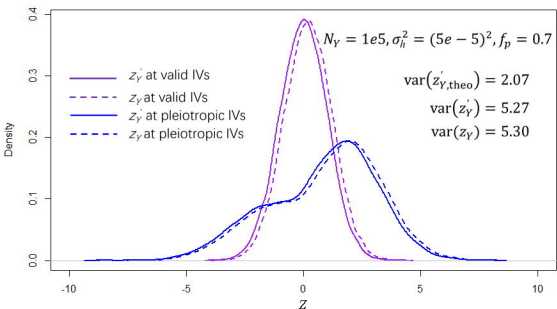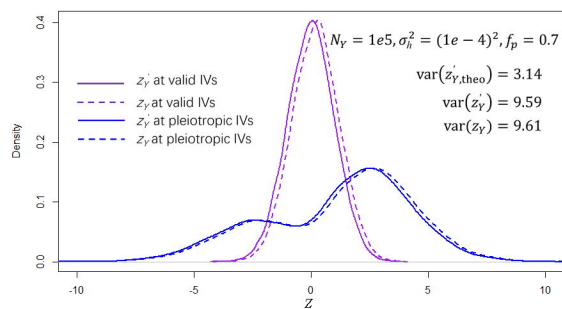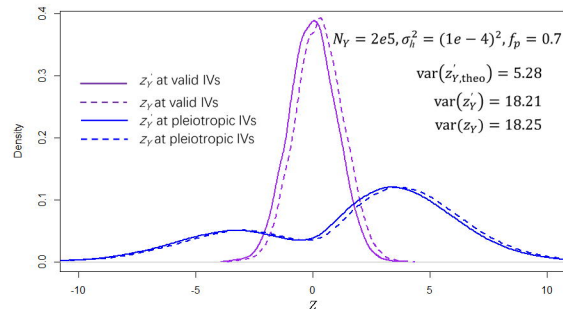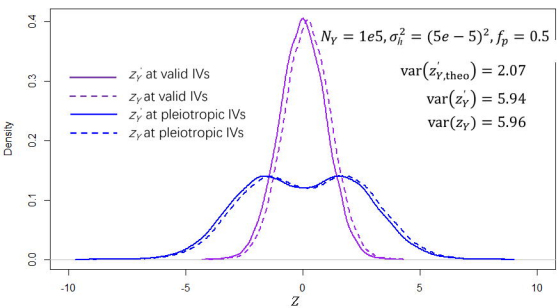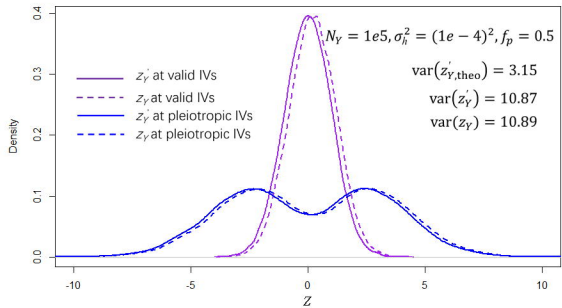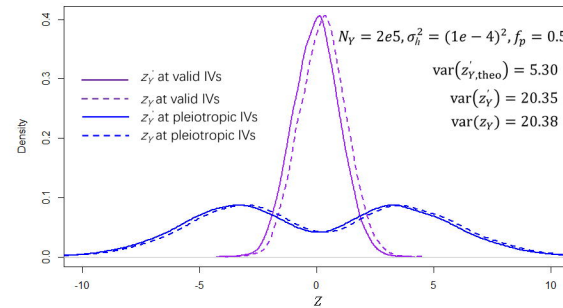

**A****The existence of pleiotropic IVs**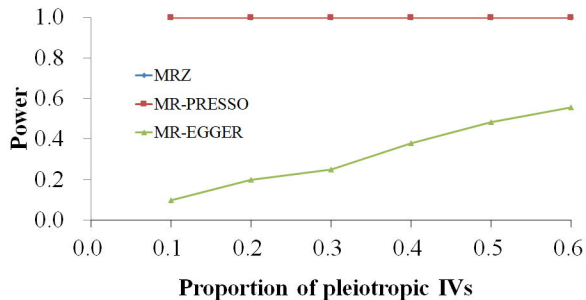**B****Proportion of pleiotropic IVs**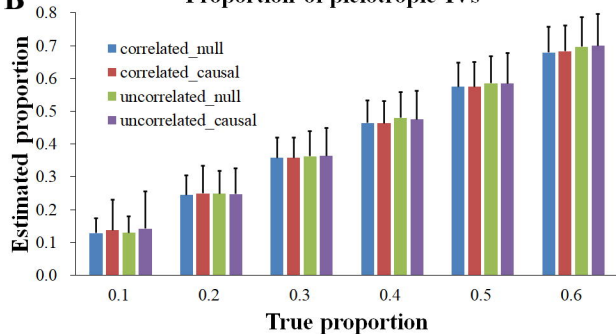**C****Proportion of correlated pleiotropic IVs**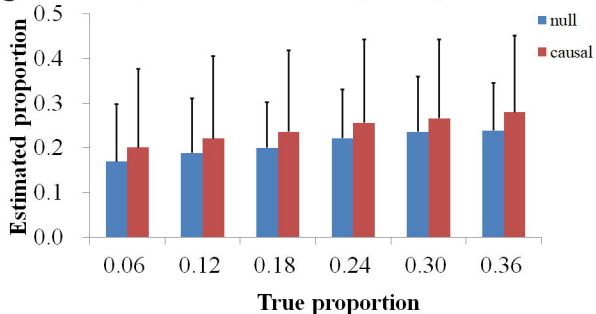**D****Correlated pleiotropic effect**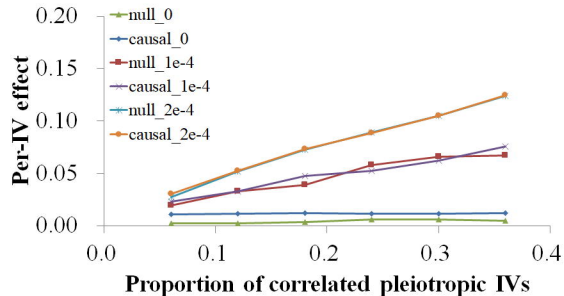



## Positive causal effect

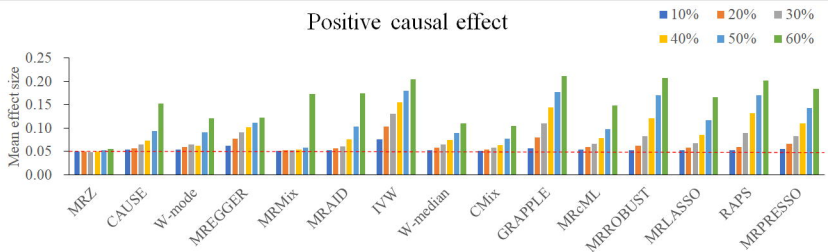

## Negative causal effect

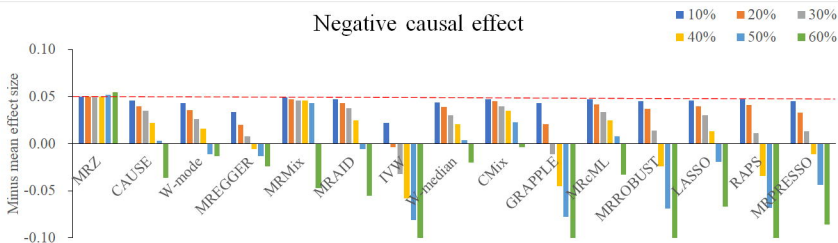



## Lipid traits

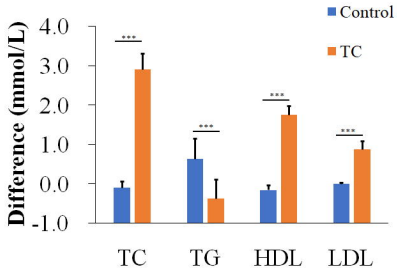

## Body compositions

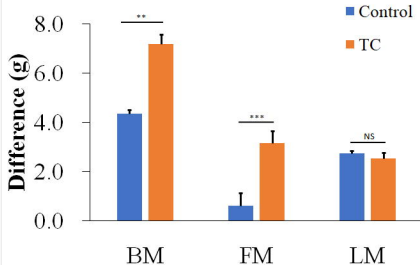

Source: http://medrxiv.stage.highwire.org/content/10.1101/2024.04.16.24305933v1.full.pdf
